1 **A Systematic Approach to Identify Recycling Endocytic Cargo**  
2 **Depending on the GARP Complex**

3  
4 **Sebastian Eising<sup>1</sup>, Lisa Thiele<sup>1</sup> and Florian Fröhlich<sup>1\*</sup>**

5  
6 <sup>1</sup>Department of Biology/Chemistry  
7 Molecular Membrane Biology Group  
8 University of Osnabrück  
9 Barbarastrasse 13  
10 49076 Osnabrück, Germany

11  
12  
13  
14  
15  
16  
17  
18  
19  
20  
21  
22  
23  
24  
25

26 \*Corresponding author:  
27 Email: [florian.froehlich@biologie.uni-osnabrueck.de](mailto:florian.froehlich@biologie.uni-osnabrueck.de)  
28 Phone: +49-541-969-2961

29 **Abstract**

30

31 Proteins and lipids of the plasma membrane underlie constant remodeling via a combination  
32 of the secretory- and the endocytic pathway. In the yeast endocytic pathway, cargo is sorted  
33 for recycling to the plasma membrane or degradation in vacuoles. In a previous paper we have  
34 shown a role for the GARP complex in sphingolipid sorting and homeostasis (Fröhlich et al.  
35 2015). However, the majority of cargo sorted in a GARP dependent process remain largely  
36 unknown. Here we use auxin induced degradation of GARP combined with mass spectrometry  
37 based vacuolar proteomics and lipidomics to show that recycling of two specific groups of  
38 proteins, the amino-phospholipid flippases and cell wall synthesis proteins depends on a  
39 functional GARP complex. Our results suggest that mis-sorting of flippases and remodeling of  
40 the lipid composition are the first occurring defects in GARP mutants. Our assay can be  
41 adapted to systematically map cargo of the entire endocytic pathway.

42

43

44

45

46

47

48

49

50

51

52

53

54

55

56

57

58

59

60

61

62

63

## 64 **Introduction**

65 The plasma membrane forms the boundary of cells that mediates all communication and  
66 transport in and out of the cell. To maintain these complex functions the composition of the  
67 plasma membrane is highly regulated and needs constant remodeling. Plasma membrane  
68 proteins and lipids are taken up by endocytosis and are delivered to early endosomes.  
69 Endosomes are the main sorting station in the endosomal pathway. These compartments are  
70 necessary for sorting, recycling and degradation of cargo molecules (Maxfield and McGraw,  
71 2004).

72 Proteins destined for degradation are sorted by the ESCRT complexes (Henne et al.,  
73 2011) into multivesicular bodies (MVBs) which are finally fused with the vacuole. The process  
74 of endosomal maturation requires switching from the Rab5 to the Rab7 GTPase as well as a  
75 change in the phosphoinositide composition (Cabrera and Ungermann, 2010; Huotari and  
76 Helenius, 2011). For the final fusion of endosomes with the lysosome/vacuole the so called  
77 HOPS (homotypic fusion and vacuole protein sorting) tethering complex and the RAB family  
78 GTPase Ypt7 are required.

79 An alternative pathway for endosomal cargo is the recycling pathway to the plasma  
80 membrane. In mammalian cells, specialized recycling endosomes recycle cargo back to the  
81 plasma membrane (Maxfield and McGraw, 2004). In yeast cells, recycling of endocytic cargo  
82 to the plasma membrane requires the Golgi apparatus. Depending on different sorting  
83 complexes such as the retromer (Seaman et al., 1998) or the Snx4/41/42 complex (Ma et al.,  
84 2017) proteins can be targeted to the Golgi. Recent discoveries suggest that the trans-Golgi  
85 network in yeast also serves as the early/recycling endosome. Additionally, yeast harbors a  
86 separate late/prevacuolar endosome (Day et al., 2018). In this model, endocytic cargo is  
87 delivered directly to the trans-Golgi network (TGN) and is further sorted for recycling or  
88 transport to the prevacuolar compartment.

89 For the tethering of retrograde endosomal transport carriers at the Golgi the GARP (Golgi  
90 associated retrograde protein trafficking) complex is required. GARP is a hetero-tetrameric  
91 complex consisting of the four subunits Vps51, Vps52, Vps53 and Vps54 and belongs to the  
92 family of CATCHR (complexes associated with tethering containing helical rods) complexes  
93 (Chou et al., 2016; Conibear and Stevens, 2000; Siniosoglou and Pelham, 2002; Vasan et  
94 al., 2010). Deletion of the GARP complex has been linked to multiple cellular dysfunctions.  
95 The first discovered and canonical pathway is the sorting of the carboxy peptidase Y (CPY)  
96 receptor Vps10 (Conibear and Stevens, 2000), hence the name Vps of all subunits. However,  
97 deletion of the GARP complex has also been linked to defects in autophagy and mitochondrial  
98 tubulation (Reggiori and Klionsky, 2006), defects in the actin cytoskeleton (Fiedler et al., 2002),

99 cell wall integrity (Conde et al., 2003), vacuole integrity (Conibear and Stevens, 2000) and  
100 several more (for a complete overview see ; Bonifacino and Hierro, 2011).

101 We have previously identified an important role for the GARP complex in lipid homeostasis  
102 (Fröhlich et al., 2015). Deletion of either subunit of the GARP complex results in the massive  
103 accumulation of sphingolipid intermediates, the long chain bases (LCBs) in cells. Interestingly  
104 all observed defects in GARP knockout mutants, including vacuolar fragmentation can be  
105 rescued by chemical depletion of sphingolipids. This suggests that sphingolipid accumulation  
106 is the causing problem in cells but the molecular mechanism for this remains largely elusive.

107 Here, we have developed a system that combines auxin induced degradation of the GARP  
108 complex with mass spectrometry based vacuolar proteomics and lipidomics to systematically  
109 identify cargo of the GARP dependent endosomal sorting pathway. We show that plasma  
110 membrane proteins of two different functional groups, amino-phospholipid flippases and cell  
111 wall biosynthesis proteins, are the first to be mis-sorted after chemical depletion of the GARP  
112 complex. We also analyze the cellular and vacuolar lipid composition to shed some light on  
113 the important functions of the GARP complex in cells.

114

## 115 **Results**

### 116 **Acute GARP inactivation by auxin-mediated degradation**

117 Deletion of any subunit of the hetero-tetrameric GARP complex results in a  
118 plethora of cellular phenotypes ranging from endosomal sorting defects, to  
119 mitochondrial dysfunction, to problems with the CVT pathway and cellular sphingolipid  
120 accumulation (Bonifacino and Hierro, 2011; Fröhlich et al., 2015). However, with its  
121 canonical role in retrograde endosome to Golgi trafficking, the first occurring changes  
122 causing the aforementioned defects remain unknown. To study the causing defects  
123 occurring in cells after deletion of the GARP complex we made use of the auxin  
124 induced degraon (AID) system. We therefore tagged the Vps53 subunit of the GARP  
125 complex c-terminally with an AID tag followed by a 6HA tag. To enable auxin-  
126 dependent recognition of Vps53-AID-6HA by an ubiquitin ligase, we expressed  
127 the *Oryza sativa* F-box transport inhibitor response-1 auxin receptor protein (OsTir1) in  
128 these cells. In immunoblot experiments we could detect similar protein levels for  
129 Vps53-AID-6HA compared to Vps53 only carrying a c-terminal 6HA tag (Fig 1a).  
130 Addition of the auxin analogue 3-indoleacetic acid (IAA) resulted in the rapid  
131 degradation of the AID tagged Vps53 (Fig 1a). Quantification of several replicates

132 revealed that 90% of the protein as degraded after 10 min. After 60 min 99% of the  
133 protein are degraded which we consider complete degradation (Fig 1a, b).

134 Mutations in the GARP complex accumulate large amounts of the sphingolipid  
135 intermediate dihydrosphingosine and show strong growth defects. This can be  
136 reversed by addition of the serine palmitoyltransferase inhibitor myriocin to the growth  
137 medium (Fröhlich et al., 2015). To test if auxin induced degradation of the GARP  
138 subunit Vps53 resembled the phenotype of the knockout we spotted cells on plates  
139 containing myriocin, IAA or a combination of both. On control plates WT cells, cells  
140 expressing only OsTir, cells expressing only the AID-tagged Vps53 and cells  
141 expressing both, the ubiquitin ligase and the AID tag on Vps53 showed normal growth,  
142 whereas *vps53Δ* showed a growth defect (Fig 1c, upper left panel). On plates  
143 containing IAA the Vps53-AID OsTir strain showed a slight growth defect (Fig 1c, upper  
144 right panel). As expected, only the *vps53Δ* strain grew on plates containing myriocin  
145 (Fig 1c, lower left panel). On plates containing a combination of IAA and myriocin the  
146 Vps53-AID OsTir strain started to grow again, showing that IAA addition to this strain  
147 results in a functional knockout (Fig 1c, lower right panel).

148

#### 149 **GARP inactivation results in vacuolar fragmentation**

150 With a chemically inducible knockout of the GARP complex we wanted to test the  
151 impact of the loss of a functional GARP complex on the cell and its organelles. GARP  
152 knockouts cells show very strong vacuolar fragmentation phenotypes. One hypothesis  
153 is that loss of GARP function results in a decrease in recycling from endosomes via  
154 the Golgi to the plasma membrane and therefore accumulation of cargo at the vacuole.  
155 One potential cargo are LCBs resulting from the breakdown of complex sphingolipids  
156 which are speculated to cause the vacuolar defects. To test the effect of acute GARP  
157 inactivation on the vacuole we tagged the vacuolar membrane protein Vph1 with a  
158 GFP tag in cells expressing Vps53-AID-HA and OsTir. In a control strain harbouring  
159 Vps53-AID-6HA without OsTir we labelled Vph1 with a cherry tag. To determine the  
160 effect of Vps53 degradation on the vacuole we mixed the two strains of the same  
161 mating type, added IAA to the cells and monitored the vacuolar morphology over time  
162 (Fig 2a). Yeast cells usually carry one to three round vacuoles, as we observed for  
163 more than 70% of the cells in both strains under conditions without IAA (Fig 2b). Over  
164 time, the addition of IAA caused an increase of cells harbouring more than 3 vacuoles  
165 as early as 30 mins after addition of IAA only in the strain carrying Vps53-AID-HA and

166 OsTir. After 90 mins of treatment this number increased to more than 65%. In contrast,  
167 control cells showed no change in the vacuolar morphology over time showing that the  
168 inactivation of GARP function rapidly results in changed vacuolar morphology (Fig 2b).  
169 However, this phenotype is not as strong as a *VPS53* deletion suggesting that the  
170 accumulation of cargo enhances the phenotype (Fröhlich et al., 2015).

171 Taken together, we hypothesized that we can identify protein and lipid cargo that  
172 is transported in a GARP dependent manner in or on purified vacuoles from cells where  
173 we chemically induced GARP depletion. To test if we can purify vacuoles from yeast  
174 cells with chemically depleted *Vps53* we tagged *Vph1* with either a GFP tag or a  
175 mCherry tag in the *Vps53*-AID strain. We induced *Vps53* depletion in the strain  
176 harbouring *Vph1*-GFP with IAA for 90 min. We next mixed both strains and purified  
177 vacuoles according to established protocols (Cabrera and Ungermann, 2008). Purified  
178 vacuoles were analyzed by live cell imaging to determine the number of purified  
179 vacuoles as well as their average diameter (Fig 2c and d). We observed a mild increase  
180 in the number of purified vacuoles from IAA treated cells together with a concomitant  
181 decrease in the average vacuolar diameter (Fig 2d), suggesting that vacuoles can still  
182 be purified from GARP depleted cells. It is possible that vacuoles that are further  
183 fragmented are lost during purification. Together, our data show that vacuoles from  
184 yeast cells with a chemically depleted GARP complex can be purified in similar  
185 numbers as to untreated control cells. This suggests that early changes in the vacuolar  
186 proteome and lipidome in GARP depleted cells can be determined systematically.

### 187 **Enriched vacuoles can be characterized by MS based proteomics**

188 To study the cargo that is transported to the vacuole in GARP depleted strains we  
189 first established the methods for purification of the vacuoles and their analysis using  
190 SILAC (Ong and Mann, 2007) labeling followed by MS based proteomics. Yeast  
191 vacuoles have been characterized by mass spectrometry based proteomics before  
192 (Wiederhold et al., 2009). In this study 77 proteins were identified that were annotated  
193 as vacuolar proteins, equalling 42% of all annotated vacuolar proteins. In total 13% of  
194 all identified proteins belonged to the vacuolar fraction. To determine the purity of  
195 vacuoles in our hands, we purified vacuoles from lysine 0 labelled cells and mixed  
196 them with total cell lysates from lysine 8, “heavy” labelled cells (Fig 3a). Our analysis  
197 resulted in a total of 1599 proteins yielding a SILAC ratio (Fig 3 - supplement 1). Of  
198 these proteins 135 were identified that are annotated as vacuolar proteins. To carefully  
199 analyze our data and identify contaminants we plotted the SILAC ratios of all identified

200 proteins against their total intensities. As expected we observed a strong bias towards  
201 proteins with low SILAC ratios reflecting proteins that are enriched in the vacuole  
202 preparations. We next binned the proteins according to their logarithmic SILAC ratios  
203 and analyzed the GO (gene ontology) terms of the different ratio bins. This analysis  
204 revealed that proteins in the two bins with the lowest SILAC ratios ( $\log_2$  ratio -5 to -6  
205 and -4 to -5) were significantly enriched in proteins with the GO term “vacuole” (P  
206  $<4.86^{-28}$  and  $P < 4.26^{-14}$ , Fig 3b and 3c). The next two higher ratio bins ( $\log_2$  ratio -4 to  
207 -5 and -2 to -4) also yielded proteins annotated as vacuolar but with lower significance  
208 values. Instead these bins were highly enriched for ER and lipid droplet localized  
209 proteins (Fig 3c). Together, these data show that we can enrich vacuolar proteins in  
210 our preparations. However, together with vacuoles we also enriched proteins from the  
211 ER and lipid droplets. This supports the idea that yeast vacuoles form extensive  
212 membrane contact sites with both organelles (Bouchez et al., 2015; Pan et al., 2000;  
213 Van Zutphen et al., 2014).

#### 214 **Acute GARP inactivation results in the accumulation of amino-phospholipid** 215 **flippases and cell wall synthesis proteins at the vacuole**

216 The canonical function for the GARP complex is the tethering of retrograde  
217 endosome to Golgi transport carriers (Conibear and Stevens, 2000). Recent  
218 discoveries suggest that the TGN can act as the early/recycling endosome in yeast,  
219 thus GARP can potentially tether endocytic vesicles originating from the plasma  
220 membrane. Independent of the pathway, we hypothesized that transport carriers that  
221 are not tethered at the Golgi in a GARP deficient strain will eventually arrive at the  
222 yeast vacuole. We should thus be able to identify the cargo by purifying vacuoles from  
223 a GARP depleted strain and compare their protein content to a control strain. Since  
224 vacuoles are completely fragmented in a GARP knockout strain we purified vacuoles  
225 from an OsTir Vps53-AID-6HA strain labelled with heavy lysine and treated with IAA  
226 and compared them to vacuoles isolated from a mock treated, light lysine labelled  
227 OsTir Vps53-AID-6HA strain. To also control the overall protein levels in the cells we  
228 quantified the entire proteome of the cell prior to vacuole purification (for the  
229 experimental setup see Fig 4a). To ensure that we identify mis-targeted proteins as  
230 early as possible we analyzed the vacuolar and cellular proteome after 0, 30, 60 and  
231 90 minutes of IAA treatment. The most pronounced phenotypes were observed after  
232 90 minutes of IAA treatment. In the purified vacuole sample we identified a total of  
233 1515 proteins with yielding a SILAC ratio (t 90 min; Figure 4- supplement 1). From

234 these proteins 78 showed a significantly increased heavy/light SILAC ratio (according  
235 to significance A (Cox and Mann, 2008),  $P < 0.05$ ; Fig 4b). In line with our hypothesis  
236 that plasma membrane proteins, following a GARP dependent transport route cannot  
237 be recycled, the most enriched group of proteins are annotated as plasma membrane  
238 proteins (GO:0005886;  $P$ -value  $< 4.74 \cdot 10^{-6}$ , 2.53 fold enrichment). Amongst these proteins  
239 are especially the plasma membrane localized amino-phospholipid flippases Dnf1 and  
240 Dnf2 as well as their adaptor protein Lem3 (Hachiro et al., 2013). Another group of  
241 enriched proteins, according to GO term analysis, belonged to fungal cell wall proteins  
242 (GO:0009277;  $P$  value  $> 2.71 \cdot 10^{-5}$ , 5.9 fold enrichment). Interestingly, both phospholipid  
243 flipping and cell wall maintenance have been previously linked to a functional GARP  
244 complex (Conde et al., 2003; Takagi et al., 2012) The complete list of proteins identified  
245 including the significant outliers is provided in supplementary table S3.

246 Motivated by our initial results we first wanted to make sure that the OsTir ubiquitin  
247 ligase itself nor the addition of IAA had any specific effect on the proteome of the cell  
248 in general and the vacuolar proteome specifically. Therefore, we analyzed the  
249 proteomes of cell lysates and isolated vacuoles from yeast cells harboring the OsTir  
250 ubiquitin ligase treated with IAA or mock treated. We did not observe changes in any  
251 of the proteins significantly enriched in the cells where we degraded the GARP complex,  
252 except for Pdr12 which was enriched in the cell lysate of IAA treated cells compared  
253 to controls (Figure 4- supplement 2). We also did not observe changes in the previously  
254 identified target proteins when we compared IAA treated cells with or without the  
255 expression of the OsTir ubiquitin ligase (Figure 4- supplement 2). Together these  
256 control experiments suggest that the proteins we find enriched at vacuoles are  
257 depending on transport by the GARP tethering complex.

258 To further validate our results, we compared OsTir Vps53-AID-6HA cells treated  
259 with IAA for 90 mins with mock treated OsTir Vps53-AID-6HA cells again. This time we  
260 switched SILAC labeling to exclude any effects on protein trafficking from heavy or light  
261 labelled lysine. This also allows us to plot the heavy to light SILAC ratios of the two  
262 experiments against each other. The two experiments are strongly anti correlated, as  
263 expected by switching SILAC labels. Importantly, many of the previously detected  
264 proteins mis-targeted to the vacuole still remain strong outliers (Fig 4c).

265 Finally, we tested if the deletion of the vacuolar proteinase A gene, *PEP4*, had an  
266 impact on the observed proteins. If proteins reach the vacuole and are internalized,  
267 they are broken down by vacuolar proteases. Thus, it is difficult to pick up peptides of



268 the proteins by MS based proteomics, since only peptides resulting from LysC  
269 digestion are searched for in the experiments. A deletion of the major vacuolar  
270 protease could therefore improve the identification rate of proteins that are enriched in  
271 vacuoles. Overall, results from this experiment improved the overall identification rate  
272 of proteins in the vacuolar samples. We again saw differences in the amino  
273 phospholipid-flippase proteins Dnf1, Dnf2 and Lem3 and in cell wall proteins. In  
274 comparison to the previous results, in these experiments we observed a vacuolar  
275 enrichment of the SNARE Tlg2 and the protein Vps45 which are known interactors of  
276 the GARP complex (Dulubova et al., 2002) (Fig 4d). However, the number of peptides  
277 of the three mentioned proteins compared to e.g. the flippases are relatively low (Figure  
278 4- supplement 3).

279 Together our data show that the amino-phospholipid flippase proteins of the  
280 plasma membrane are specifically re-routed to the vacuole in cells where we induce the  
281 depletion of the GARP complex. For a protein that is shifted from a recycling pathway  
282 to a degradation pathway, we expected that the overall protein levels in the cell are  
283 decreased, while the amount on or in the vacuolar fraction increased. We only  
284 observed a small decrease in total cell lysates for Dnf1 (Fig 4e). The protein levels for  
285 Lem3 were below the detection limit in the cell lysate. In contrast, we saw the overall  
286 protein levels of Pdr12 increasing in both, the vacuolar and the cell lysate sample. This  
287 suggests that the expression of the multi-drug transporter Pdr12 is increased by the  
288 addition of IAA (Fig 4e). This also leads to the conclusion that Pdr12 is probably  
289 transporting IAA out of the cell and a *pdr12Δ* strain could be more sensitive to lower  
290 levels of IAA. This has to be evaluated in the future. Interestingly, we did not observe  
291 any changes in the best described GARP dependent protein, the CPY receptor Vps10.  
292 In both the vacuolar fraction and the cell lysate the levels of Vps10 remain unchanged  
293 (Fig 4e). One explanation for this observation is that the levels of Vps10 at the vacuole  
294 are already high in mock treated cells. This is exactly what we observe while we did  
295 not detect any Dnf2 signal at the vacuole under these conditions.

296 We also hypothesized that the method we have developed to map endocytic  
297 recycling cargo could be used to identify the endocytic adaptors for the proteins that  
298 are recycled. Flippases have previously been linked to the Sla1 dependent endocytosis  
299 (Liu et al., 2007). However, we were not able to purify sufficient amounts of vacuoles  
300 from *sla1Δ* cells to analyse their proteomic composition. To test our hypothesis  
301 alternatively, we deleted the AP-2 adaptor complex subunit *APL1* in our functional

302 Vps53-AID strain. Proteomic analysis of enriched vacuoles from “*light*” labelled OsTir  
303 Vps53-AID-6HA cells compared to “*heavy*” labelled OsTir Vps53-AID-6HA *apl1Δ* cells,  
304 both treated with IAA for 90 min revealed that the amino-phospholipid flippases Dnf1,  
305 Dnf2 and Lem3 were identified at the vacuole in both strains, yielding a SILAC ratio of  
306 approximately 1 (Fig 4f and Fig 4- supplement 4). Only three proteins involved in cell  
307 wall maintenance that we have identified as enriched in vacuoles in GARP depleted  
308 cells (Chs1, Cwp1 and Flc2) are lower abundant at vacuoles from AP-2 deleted OsTir  
309 Vps53-AID-6HA cells (Fig 4f). This suggests that proteins involved in cell wall  
310 maintenance are constantly shuttled between the plasma membrane and the Golgi  
311 using AP-2 as the endocytic adaptor complex. The endocytic adaptor for the amino-  
312 phospholipid flippases remains unknown. However, this observation confirms that our  
313 method is useful to detect adaptor complexes for endocytic proteins.

#### 314 **Dnf1, Dnf2 and Lem3 are targets of GARP dependent recycling**

315 The amino phospholipid flippases Dnf1 and Dnf2 as well as the adaptor protein  
316 Lem3 are integral parts of the plasma membrane and responsible for generating  
317 phospholipid asymmetry across the plasma membrane (Hachiro et al., 2013; Nakano  
318 et al., 2008). They have been linked to endocytosis as well as sphingolipid homeostasis  
319 (Hachiro et al., 2013; Roelants et al., 2010). It has been suggested that Dnf1 and Dnf2  
320 constantly shuttle between the plasma membrane and endosomes and this transport  
321 has been previously linked to the GARP complex (Takagi et al., 2012). Our MS results  
322 suggested that both, Dnf1 and Dnf2 as well as Lem3 are not recycled in GARP  
323 depleted cells and instead are re-routed to the vacuole. To confirm our MS data we  
324 tagged each of the proteins with the mNeon green fluorescent protein (Shaner et al.,  
325 2013) in cells also harboring the vacuole localized Vph1-mCherry as well as OsTir and  
326 the AID-tagged Vps53. While we were unable to detect any signal for Dnf1-mNeon,  
327 Dnf2 and Lem3 both localized to the plasma membrane with an enrichment at either  
328 the bud or the bud neck and also some puncta (Fig 5a, c). Importantly, we did not  
329 observe any co-localization of the dots with Vph1-mCherry labelled vacuoles. When  
330 we compared IAA treated to mock treated cells after 30, 60 and 90 min of treatment  
331 we observed an increasing number of cells that showed Dnf1 or Lem3 signal co-  
332 localizing with the vacuole which we also quantified (Fig 5a,b,c,d). This phenotype was  
333 always observed in cells that had fragmented vacuoles. In comparison, mock treated  
334 cells showed no increase in vacuolar Lem3 or Dnf2 signal as well as no increase in  
335 vacuolar fragmentation. To control that IAA treatment itself did not affect our results

336 we analyzed Dnf2 and Lem3 localization in IAA treated cells that were either harboring  
337 only OsTir or OsTir and an AID tagged version of Vps53. Here, we also observed Dnf2  
338 and Lem3 localization to the vacuole only in Vps53-AID tagged cells treated with IAA,  
339 thus ruling out any side effects from the IAA treatment Fig 5 supplement 1 a, b).

340 Interestingly, both Dnf2 and Lem3 localization to the fragmented vacuoles appear  
341 to colocalize with the Vph1-mCherry. This suggests that both proteins are not delivered  
342 to the vacuolar lumen but instead localize to the vacuolar membrane. To test this  
343 hypothesis we tagged Dnf2, Lem3, Pdr12 and as a control Itr1 c-terminally with a  
344 *pho8Δ60* in a strain lacking both *PHO8* and *PHO13*. If the proteins are delivered to the  
345 vacuolar lumen, *pho8Δ60* is cleaved and becomes active. This activity can be  
346 measured in a *pho8* assay (Yao et al., 2017). As expected, the inositol transporter Itr1  
347 shows an increase in *pho8* activity after addition of inositol. In contrast, neither Dnf2  
348 nor Lem3 or Pdr12 tagged with *pho8Δ60* showed an increase in Pho8 activity  
349 suggesting that the proteins are not delivered to the vacuolar lumen (Fig 5e).

350 We also analyzed the localization of mNeon tagged Pdr12 and Vps10. As MS data  
351 suggested, the expression levels of Pdr12 are massively increased upon treatment of  
352 the cells with IAA (Fig 5 supplement 1 d). This confirms our hypothesis, that Pdr12 is  
353 the main transporter for IAA out of the cell. Also in line with our MS data, we did not  
354 observe any changes in the localization of Vps10 after the indicated times of IAA  
355 treatment (Fig 5 supplement 1 c).

### 356 **Depletion of the GARP complex phenocopies a Lem3 deletion**

357 The results we obtained from both, MS based proteomics and live cell imaging  
358 suggest that Dnf1, Dnf2 and their adaptor protein Lem3 are mis-targeted to the vacuole  
359 in cells where the degradation of the GARP complex is initiated. This suggests, that  
360 the phenotypes observed in a *lem3Δ* strain should be phenocopied in strains where the  
361 GARP complex is depleted. To test this hypothesis we first analyzed correlation  
362 coefficients of LEM3 and GARP subunits from high throughput chemical-genomics  
363 screens (REF). This analysis shows a very high correlating profiles of *LEM3* and  
364 *VPS52* with other genes involved in the GARP dependent recycling pathway, such as  
365 *TLG2* and *VPS45* (Fig 6a).

366 *LEM3* deleted cells are highly resistant to the cytotoxic phosphatidylcholine (PC)  
367 analog miltefosine (Puts et al., 2012). We therefore spotted WT cells, *vps53Δ* cells,  
368 *lem3Δ* cells, cells expressing OsTir and cells expressing both, OsTir and Vps53-AID  
369 on control plates, plates containing IAA, plates containing miltefosine and plates

370 containing both, miltefosine and IAA. On control plates and IAA plates cells grew as  
371 expected. Only a *vps53Δ* strain showed a growth defect under these conditions, as  
372 reported previously. The addition of miltefosine resulted in a complete growth arrest in  
373 all strains, except *lem3Δ* and *vps53Δ* (Fig 6b). This already suggests that the *vps53Δ*  
374 strain pheno-copies a deletion of LEM3. The addition of both, IAA and miltefosine  
375 resulted in the additional growth of the Vps53-AID strain also expressing OsTir, thus  
376 confirming that the strain loses the functionality of Lem3 because of its transport to the  
377 vacuole. We also tested if the overexpression of Lem3 rescues the observed  
378 phenotype. The Vps53-AID strain overexpressing Lem3 from the TEF promotor also  
379 grew in the presence of IAA and miltefosine (Fig 6b). This suggests that the observed  
380 phenotype is also dependent on the two proteins Dnf1 and Dnf2 that form a functional  
381 complex with Lem3. Overexpression of the adaptor protein should therefore not rescue  
382 the phenotype.

383 We have previously shown that the deletion of the GARP subunit *VPS53* results in  
384 severe changes in the sphingolipid composition in the cell (Fröhlich et al., 2015). The  
385 observation that depletion of the GARP complex results in the mis-targeting of all  
386 plasma membrane amino-phospholipid flippases to the vacuole suggests that also the  
387 phospholipid homeostasis in GARP deleted cells is disturbed. To test this hypothesis  
388 we isolated lipids from IAA treated OsTir Vps53-AID-6HA and OsTir Vps53-6HA cells  
389 without an AID tag and analyzed the levels of the most abundant phospho-  
390 glycerolipids phosphatidic acid (PA), phosphatidyl-serine (PS), phosphatidyl-inositol  
391 (PI), phosphatidyl-ethanolamine (PE) and phosphatidylcholine (PC) and  
392 phosphpatidyl-glycerol (PG) as well as the sphingolipid intermediates long chain bases  
393 (LCB) and ceramides (CER) (Fig 6c). Interestingly, we observed significant changes  
394 in the PC to PE ratio with a significant change in PE levels ( $P=0.04448$ ). These are the  
395 two lipid classes that are flipped across the bilayer by Dnf1 and Dnf2 (Stevens et al.,  
396 2008). This suggests that the depletion of the GARP complex and the concomitant loss  
397 of flippases from the plasma membrane results in changes in the overall phospholipid  
398 composition. We also detected a significant 1.5 fold increase in LCBs in GARP  
399 depleted cells ( $P=0.01525$ ). Although similar to GARP knockouts, this is a much  
400 smaller increase then we had detected previously for GARP knockout mutants  
401 (Fröhlich et al., 2015).

402 To test if we see any changes in the lipid composition of the vacuole we purified  
403 vacuoles from IAA treated OsTir Vps53-AID-6HA and OsTir Vps53-6HA cells without

404 an AID tag and analysed their lipid composition by MS based lipidomics. In this case  
405 we did not detect any significant changes for LCB levels nor for the general  
406 phospholipid composition. The only exception to this was phosphatidyl-serine which is  
407 significantly reduced in vacuoles of GARP depleted cells ( $P=0.03305$ ; Fig 6d).

408

## 409 **Discussion**

410 Here we developed a novel assay based on auxin induced degradation of the  
411 GARP complex followed by MS based analysis of the vacuolar proteome and lipidome.  
412 This assay allows identification of proteins targeted to the vacuole instead of being  
413 recycled to the plasma membrane in a GARP complex dependent process. We go on  
414 to show that two groups of proteins, amino phospholipid flippases and cell wall proteins  
415 are specifically mis-targeted to the vacuole. Especially the mis-localization of the  
416 several flippases, usually localized to the plasma membrane results in changes in lipid  
417 homeostasis.

418 Mutations in the GARP complex result in a large variety of phenotypes in the yeast,  
419 *Saccharomyces cerevisiae*, ranging from protein sorting defects (Conibear and  
420 Stevens, 2000), to defects in autophagy and mitochondrial tubulation (Conibear and  
421 Stevens, 2000) to sphingolipid homeostasis (Fröhlich et al., 2015). The canonical  
422 pathway for the GARP complex is the retrograde transport of the CPY receptor Vps10.  
423 While it is clear that GARP mutations cause a CPY transport defect it seems unlikely  
424 that all the other observed phenotypes are a consequence of this. To understand the  
425 complexity of the phenotypes of GARP mutations it is necessary to identify the first  
426 defects occurring in the cell after GARP depletion.

427 The assay we developed allows us to observe the changes appearing in the cell  
428 as early as 30 minutes after depletion of the GARP complex. We observe rapidly  
429 occurring re-localization of the amino-phospholipid flippases Dnf1 and Dnf2 as well as  
430 their adaptor protein Lem3 from the plasma membrane to the yeast vacuole.  
431 Interestingly, these proteins do not seem to reach the vacuolar lumen, suggesting that  
432 the transport carriers do not fuse with the vacuole and are not destined to arrive at the  
433 vacuole in WT cells.

434 Flippases are crucial to maintain phospholipid asymmetry across the plasma  
435 membrane (Hachiro et al., 2013; Nakano et al., 2008). The loss of these proteins in the  
436 plasma membrane most likely results in changes of the plasma membrane lipid  
437 composition. This note is supported by the changes in the PE to PC ratio we observe

438 in cells. This could also explain why subunits of the GARP complex have been  
439 identified in screens using plasma membrane organization as a readout (Fröhlich et  
440 al., 2009; Grossmann et al., 2008). It is also possible that changes in the plasma  
441 membrane composition affect the lipid composition of endocytic vesicles derived from  
442 the plasma membrane and thus endocytic sorting. Such defects have previously been  
443 shown in yeast strains harbouring mutations of flippase proteins (Hachiro et al., 2013;  
444 Hua et al., 2002).

445 We have previously suggested that the accumulation of sphingolipids causes the  
446 vacuolar fragmentation in *vps53Δ* cells. This theory is supported by the fact that  
447 depletion of sphingolipids reverses the vacuolar fragmentation defect observed in cells  
448 (Fröhlich et al., 2015). A recent report also suggests that changes in phospholipids that  
449 are transported to the vacuole could result in vacuolar fragmentation (Ma et al., 2018).  
450 However, we could not detect changes in the vacuolar lipid composition in GARP  
451 depleted cells but still observe vacuolar fragmentation as early as 60 mins after  
452 depletion of Vps53. It remains possible that our vacuole purification protocol  
453 systematically excludes highly fragmented vacuoles where certain lipids are enriched.  
454 Our microscopic analysis of purified vacuoles from GARP depleted cells allows this  
455 conclusion. It remains also possible that the fragmentation of vacuoles is not the  
456 consequence of the accumulation of LCBs but rather depends on different factors. A  
457 possible explanation can be a change in ion homeostasis due to changes in plasma  
458 membrane composition and thus permeability (Mioka et al., 2018). Changes in  
459 vacuolar morphology could lead to changes in lipid export, especially LCBs, leading to  
460 the massive accumulation we observed previously in GARP knockout cells. Better  
461 protocols for the purification and lipidomic analysis of vacuoles will be crucial to answer  
462 these questions in the future. Understanding the lipid related phenotypes will be crucial  
463 to understand the effect of mutations in GARP subunit in human disease (Feinstein et  
464 al., 2014; Gershlick et al., 2018).

465 Our study also gives new insights in the general organization of the endosomal  
466 pathway in yeast. A recent report suggests that yeast has a minimal endosomal system  
467 where the trans Golgi network can function as an early/sorting endosome (Day et al.,  
468 2018). Our data suggest that two classes of proteins, the amino phospholipid flippases  
469 and cell wall proteins such as Chs1 are constantly shuttling between the plasma  
470 membrane and the Golgi complex. The GARP complex, in this scenario can also be a  
471 tether for vesicles directly arriving from the plasma membrane and not only for

472 retrograde endosomal transport carriers. For cell wall maintenance proteins we have  
473 evidence that the yeast AP-2 complex is the endocytic adaptor. So far, the function of  
474 AP-2 in yeast remains enigmatic. One report suggests the cell wall integrity sensor  
475 Mid2 is a cargo of the AP-2 complex and that cell wall maintenance in general is  
476 depending on AP-2 (Chapa-y-Lazo et al., 2014). While we do not find Mid2 at the  
477 vacuole in GARP depleted cells we observe several other cell wall related proteins  
478 including Chs1, Cwp1 and Flc2. All these proteins are not accumulating at the vacuole  
479 of GARP depleted cells when the AP-2 adaptor complex is knocked out. In contrast,  
480 flippase recycling is reported to be dependent on the endocytic adaptor Sla1 (Liu et al.,  
481 2007). While we were unable to purify vacuoles from *sla1Δ* cells, this suggests that  
482 several endocytic pathways are dependent on tethering by the GARP complex.

483 Finally, we anticipate our assay to be a very useful tool to systematically study the  
484 endosomal sorting pathway. The combination of vacuole purification and mass  
485 spectrometry proteomics can be used to determine cargo of several sorting complex.  
486 For example, acute depletion of the AP3 complex (Linares et al., 2015) should result  
487 in the lack of proteins delivered to the vacuole via this pathway. Alternatively, the assay  
488 could be adapted to identify cargo of the AP-2 complex that is localized to the yeast  
489 plasma membrane (Rad et al., 1995). But in contrast to its mammalian counterpart its  
490 function and cargo remain largely elusive.

491

## 492 **Materials and methods**

### 493 **Yeast strains and plasmids**

494 Yeast strains used in this study are described in supplementary table S1.  
495 Plasmids used in this study are summarized in supplementary table S2.

### 496 **Yeast media and growth conditions**

497 Yeast strains were grown according to standard procedures. For spotting  
498 assays, myriocin, IAA and miltefosine were added at concentrations as indicated and  
499 the plates were incubated at 30°C for 48 hrs.

500 For SILAC labeling procedures yeast cells were grown in SDC-lysine medium  
501 consisting of 2% glucose, 6.7g/L yeast nitrogen base without amino acids (XXX) and  
502 yeast synthetic dropout without lysine (Sigma Aldrich). Pre cultures were grown over  
503 night in the presence of 30mg/L normal lysine or heavy lysine (L-Lysine  $^{13}\text{C}_6^{15}\text{N}_2$ ;

504 Cambridge Isotope Laboratories) and diluted to  $OD_{600}=0.1$ . Cells were grown to  
505  $OD_{600}=0.5-1.0$  before harvest.

### 506 **Vacuole isolation**

507 For Western blot analysis vacuoles were purified from 1L YPD culture. Cells  
508 were incubated with 500  $\mu$ M IAA or same amount abs. EtOH (for negative ctrl) at  
509  $OD_{600}=0.5-0.8$  for 90 min at 30°C. The logarithmic phase cells were harvested with  
510 centrifugation and the pellet treated with Tris-buffer (0.1 M Tris, pH 9.4; 10 mM DTT)  
511 and spheroblasting buffer (0.6 M sorbitol, 50 mM KPi, pH 7.4, in 0.2x YPD). After  
512 lyticase digestion, vacuoles were isolated via dextran lysis and Ficoll gradient flotation  
513 (Cabrera and Ungermann, 2008). 500  $\mu$ l of the 0-4% interphase were taken and mixed  
514 with 25  $\mu$ l 20x PIC. Protein concentration was measured with Bradford assay. For MS  
515 experiments vacuoles were purified from 500 ml SDC-Lys medium. To compare two  
516 settings one strain grown in SDC-Lys +heavy lysine (K8, 30  $\mu$ g/ml final) and the other  
517 in SDC-Lys +light lysine (K0, 30  $\mu$ g/ml final) at 30°C. Cultures were treated with 500  
518  $\mu$ M IAA or ethanol (as ctrl) for 30-90 min. Before centrifugation same OD-units of both  
519 cell cultures were mixed and harvested together.

### 520 **Fluorescence microscopy**

521 Cells were grown to logarithmic phase in synthetic medium, supplemented with  
522 essential amino acids (SDC). IAA was added at concentrations indicated. Cells were  
523 imaged live in SDC media unless stated otherwise on an Olympus IX-71 inverted  
524 microscope equipped with 100x NA 1.49 and 60x NA 1.40 objectives, a sCMOS  
525 camera (PCO, Kelheim, Germany), an InsightSSI illumination system, 4',6-diamidino-  
526 2-phenylindole, GFP and mCherry filters, and SoftWoRx software (Applied Precision,  
527 Issaquah, WA). We used constrained-iterative deconvolution (SoftWoRx). All  
528 microscopy image processing and quantification was performed using ImageJ  
529 (National Institutes of Health, Bethesda, MD).

### 530 **Western blot**

531 For Western blot comparison of vacuole and cell samples purified vacuoles or  
532 whole cell lysate was used. For cell lysate samples 250  $\mu$ l RIPA buffer (25 mM Tris-  
533 HCl pH 7.6, 150 mM NaCl, 1% NP-40, 1% Na-Deoxycholate, 0.1% SDS) and 500  $\mu$ l  
534 zirconia beads were added to the cell pellet in a 1.5 ml reaction tube and lysed for 40  
535 s at 4°C with the Fast Prep system (MP biomedical). The tubes were pierced at the



536 bottom and the lysate centrifuged at 4000 rpm and 4°C for 30 s in a new tube. Lysate  
537 was centrifuged again for 5 min at 14.000 rpm and the supernatant used for Western  
538 blot. Protein concentration was determined via Bradford assay. Samples were  
539 analyzed by western blotting. HA tagged proteins were detected with a mouse anti-HA  
540 antibody 12CA5 (Roche) diluted 1:2000, Pgk1 using a 1:20000 dilution of a mouse  
541 antibody (ThermoFisher) and horseradish peroxidase coupled a-mouse antibodies  
542 (Santa Cruz biotechnology).

543

#### 544 **Purification for Mass spectrometry of peptides**

545 Mass spectrometry was done with purified vacuoles and whole cell lysate, vacuoles  
546 were further purified by in-gel digest and cell lysate samples by Filter Aided Sample  
547 Preparation (FASP; Wiśniewski et al., 2009). Purified vacuole samples were  
548 precipitated with 100% TCA and the protein pellet washed with Acetone. The pellet  
549 was solved in 4x loading dye and loaded on a 10% denaturing SDS-gel for some  
550 minutes. All following steps were performed in glass vials. Gel pieces with proteins  
551 were cut and incubated in destaining buffer (25 mM NH<sub>4</sub>HCO<sub>3</sub> (ABC) / 50% EtOH)  
552 twice for 20 min at 25°C under shaking. After Dehydration in 100% EtOH (twice for 10  
553 min at 25°C) and drying the gel pieces were rehydrated in reduction buffer (10 mM  
554 DTT in 50 mM ABC) for 60 min at 56°C followed by alkylation (55 mM iodoacetamide  
555 in 50 mM ABC) for 45 min at 25°C in the dark and another washing step for 20 min  
556 with digestion buffer. After dehydration in EtOH (10 min, 25°C) and washing with  
557 digestion buffer (50 mM NH<sub>4</sub>HCO<sub>3</sub> in water, pH 8.0, 20 min, 25°C) gel pieces were  
558 again incubated twice with EtOH for 10 min and dried. Gel pieces were rehydrated in  
559 LysC solution (final 16 µg/ml in 50 mM ABC) for 20 min at 4°C, the excess of solution  
560 was removed, digestion buffer added and the sample incubated over night at 37°C.  
561 Digestion was stopped by adding 2µl 100% TFA. Gel pieces were incubated twice in  
562 extraction buffer (3% TFA / 30% ACN) for 10 min at 25°C and twice with ACN for 10  
563 min at 25°C. The supernatants were collected and dried until most of the solvent was  
564 gone and resolved in 50 µl HPLC-grade water. Cell lysate pellets were lysed in 200 µl  
565 lysis buffer (Tris 0.1 M, pH 9; 0.1 M DTT; 5% SDS) for 30 min at 55°C and mixed with  
566 1.2 ml 8 M urea in 0.1 M Tris/HCl pH 8.5 (UA). The cell lysate was centrifuged in a wet  
567 filter unit (30.000K) for 15 min at 14.000 rpm and the filter washed four times with 200  
568 µl UA for each 10 min. 200 µl IAA solution (0.05 M iodoacetamide in UA) was added

569 to the filter units, shaken vigorously for 1 min and then incubated for 20 min without  
570 mixing in the dark. Samples were washed four times with UA for 10 min at 14,000 rpm  
571 and washed again with 50 mM ABC and three times with 20 mM. Reversed-phase  
572 chromatography was performed on a Thermo Ultimate 3000 RSLCnano system  
573 connected to a Q Exactive*Plus* mass spectrometer (Thermo) through a nano-  
574 electrospray ion source. Peptides were separated on 50 cm PepMap® C18 easy spray  
575 columns (Thermo) with an inner diameter of 75 µm. The column temperature was kept  
576 at 40 °C. Peptides were eluted from the column with a linear gradient of acetonitrile  
577 from 10%–35% in 0.1% formic acid for 118 min at a constant flow rate of 300 nl/min.  
578 Eluted peptides from the column were directly electrosprayed into the mass  
579 spectrometer. Mass spectra were acquired on the Q Exactive*Plus* in a data-dependent  
580 mode to automatically switch between full scan MS and up to ten data-dependent  
581 MS/MS scans. The maximum injection time for full scans was 50 ms, with a target  
582 value of 3,000,000 at a resolution of 70,000 at  $m/z = 200$ . The ten most intense multiply  
583 charged ions ( $z=2$ ) from the survey scan were selected with an isolation width of 1.6  
584 Th and fragment with higher energy collision dissociation (Olsen et al., 2007) with  
585 normalized collision energies of 27. Target values for MS/MS were set at 100,000 with  
586 a maximum injection time of 80 ms at a resolution of 17,500 at  $m/z = 200$ . To avoid  
587 repetitive sequencing, the dynamic exclusion of sequenced peptides was set at 30 s.  
588 The resulting MS and MS/MS spectra were analyzed using MaxQuant (version  
589 1.6.0.13, [www.maxquant.org/](http://www.maxquant.org/); (Cox and Mann, 2008; Cox et al., 2011) as described  
590 previously (Fröhlich et al., 2013). All calculations and plots were performed with the R  
591 software package ([www.r-project.org/](http://www.r-project.org/))

## 592 **Lipidomics**

593 For the LC-MS/MS analysis, lipids were extracted from lysed yeast cells or  
594 purified vacuoles according to 12 µg of protein by chloroform/methanol extraction  
595 (Ejsing et al., 2009). Prior to extraction a standard mix containing (phosphatidic acid  
596 (PA 17:0/14:1), phosphatidylserine (PS 17:0/14:1), phosphatidylinositol (PI 17:0/14:1),  
597 phosphatidylethanolamine (PE 17:0/14:1), phosphatidylglycerol (PG 17:0/14:1),  
598 phosphatidylcholine (PC 17:0/14:1); sphingosine (LCB 17:0) and ceramide (CER  
599 18:0/17:1)) was spiked into each sample for normalization and quantification. Dried lipid  
600 samples were dissolved in a 65:35 mixture of mobile phase A (60:40 water/acetonitrile,  
601 including 10 mM ammonium formate and 0.1% formic acid) and mobile phase B

602 (88:10:2 2-propanol/acetonitrile/H<sub>2</sub>O, including 2 mM ammonium formate and 0.02%  
603 formic acid). HPLC analysis was performed employing a C30 reverse-phase column  
604 (Thermo Acclaim C30, 2.1 x 250 mm, 3 μm, operated at 50° C; Thermo Fisher  
605 Scientific) connected to an HP 1100 series HPLC (Agilent) HPLC system and a  
606 QExactivePLUS orbitrap mass spectrometer (Thermo Fisher Scientific) equipped with  
607 a heated electrospray ionization (HESI) probe. The elution was performed with a  
608 gradient of 45 minutes; during 0–3 minutes, elution starts with 40% B and increases to  
609 100%; in a linear gradient over 23 mins. 100% B is maintained for 3 mins. Afterwards  
610 solvent B was decreased to 40% and maintained for another 15 minutes for column  
611 re- equilibration. The flow-rate was set to 0.1 mL/min. MS spectra of lipids were  
612 acquired in full-scan/data-dependent MS<sup>2</sup> mode. The maximum injection time for full  
613 scans was 100 ms, with a target value of 3,000,000 at a resolution of 70,000 at m/z  
614 200 and a mass range of 200–2000 m/z in both, positive and negative mode. The 10  
615 most intense ions from the survey scan were selected and fragmented with HCD with  
616 a normalized collision energy of 30. Target values for MS/MS were set at 100,000 with  
617 a maximum injection time of 50 ms at a resolution of 17,500 at m/z 200. To avoid  
618 repetitive sequencing, the dynamic exclusion of sequenced lipids was set at 10 s.  
619 Peaks were analyzed using the Lipid Search algorithm (MKI, Tokyo, Japan). Peaks  
620 were defined through raw files, product ion and precursor ion accurate masses.  
621 Candidate molecular species were identified by database (>1,000,000 entries) search  
622 of positive (+H<sup>+</sup>; +NH<sub>4</sub><sup>+</sup>) or negative ion adducts (-H<sup>-</sup>; +COOH<sup>-</sup>). Mass tolerance was  
623 set to 5 ppm for the precursor mass. Samples were aligned within a time window and  
624 results combined in a single report. From the intensities of lipid standards and lipid  
625 classes absolute values for each lipid in pmol/mg protein were calculated. Data are  
626 displayed as mol% of total lipids measured.

## 627 **Pho8-Assay**

628 Cells are grown to log phase in SDC medium (or SDC-inositol for control  
629 samples) and were incubated with 500 μM auxin or EtOH for 90 min (or 1 mM inositol  
630 for 30 min, control samples). A cell pellet equivalent to 3 OD units was washed with  
631 water and again with ice cold 0.85% NaCl containing PMSF. The supernatant was  
632 removed and the pellet resuspended in 300μl ice cold lysis buffer (20mM PIPES, 0.5%  
633 Triton X-100, 50mM KCl, 100mM potassium acetate, 10mM MgSO<sub>4</sub>, 10μM ZnSO<sub>4</sub>,  
634 1mM PMSF). The cells were lysed with glass beads in a Fast Prep Homogenizer at

635 4°C. After centrifugation 100 µl of the supernatant were mixed with 400 µl prewarmed  
636 reaction buffer (125mM p-nitrophenyl phosphate (pNPP), 250mM Tris-HCl, pH 8.5,  
637 0.4% Triton X-100, 10mM MgSO<sub>4</sub>, 10 µM ZnSO<sub>4</sub>). Blanks were performed with 100 µl  
638 of reaction buffer instead of cell lysate. Samples were incubated at 37°C for 15-25 min  
639 and the reaction stopped with 500 µl stop solution (1M glycine/KOH, pH 11.0). The  
640 samples were centrifuged at maximal speed for 2 min and the absorbance measured  
641 at 400 nm (Klionsky, 2007).

642

## 643 **Acknowledgments**

644 We thank members of the Fröhlich lab for discussions and careful reading of the  
645 manuscript. We thank Robbie Loewith, David Teis and Christian Ungermann for  
646 sharing of reagents. We thank Stefan Walter for support and maintenance of the mass  
647 spectrometer. Florian Fröhlich is supported by the DFG grant FR 3647/2-1 and the  
648 SFB944.

649

## 650 **References**

651 Bonifacino, J.S., and Hierro, A. (2011). Transport according to GARP: Receiving  
652 retrograde cargo at the trans-Golgi network. *Trends Cell Biol.* 21, 159–167.

653 Bouchez, I., Pouteaux, M., Canonge, M., Genet, M., Chardot, T., Guillot, A., and  
654 Froissard, M. (2015). Regulation of lipid droplet dynamics in *Saccharomyces*  
655 *cerevisiae* depends on the Rab7-like Ypt7p, HOPS complex and V1-ATPase. *Biol.*  
656 *Open* 4, 764–775.

657 Cabrera, M., and Ungermann, C. (2008). Purification and in vitro analysis of yeast  
658 vacuoles. *Methods Enzymol.* 451, 177–196.

659 Cabrera, M., and Ungermann, C. (2010). Guiding Endosomal Maturation. *Cell* 141,  
660 404–406.

661 Chapa-y-Lazo, B., Allwood, E.G., Smaczynska-de Rooij, I.I., Snape, M.L., and  
662 Ayscough, K.R. (2014). Yeast Endocytic Adaptor AP-2 Binds the Stress Sensor Mid2  
663 and Functions in Polarized Cell Responses. *Traffic* 15, 546–557.

664 Chou, H.-T., Dukovski, D., Chambers, M.G., Reinisch, K.M., and Walz, T. (2016).  
665 CATCHR, HOPS and CORVET tethering complexes share a similar architecture. *Nat.*  
666 *Struct. Mol. Biol.* 13–16.

- 667 Conde, R., Pablo, G., Cueva, R., and Larriba, G. (2003). Yeast Functional Analysis  
668 Report Screening for new yeast mutants affected in mannosylphosphorylation of cell  
669 wall mannoproteins. *Yeast* 20, 1189–1211.
- 670 Conibear, E., and Stevens, T.H. (2000). Vps52p, Vps53p, and Vps54p form a novel  
671 multisubunit complex required for protein sorting at the yeast late Golgi. *Mol. Biol. Cell*  
672 11, 305–323.
- 673 Cox, J., and Mann, M. (2008). MaxQuant enables high peptide identification rates,  
674 individualized p.p.b.-range mass accuracies and proteome-wide protein quantification.  
675 *Nat. Biotechnol.* 26, 1367–1372.
- 676 Cox, J., Neuhauser, N., Michalski, A., Scheltema, R.A., Olsen, J. V., and Mann, M.  
677 (2011). Andromeda: A peptide search engine integrated into the MaxQuant  
678 environment. *J. Proteome Res.* 10, 1794–1805.
- 679 Day, K.J., Casler, J.C., and Glick, B.S. (2018). Budding Yeast Has a Minimal  
680 Endomembrane System. *Dev. Cell* 44, 56–72.e4.
- 681 Dulubova, I., Yamaguchi, T., Gao, Y., Min, S.-W., Huryeva, I., Südhof, T.C., and Rizo,  
682 J. (2002). How Tlg2p/syntaxin 16 “snares” Vps45. *EMBO J.* 21, 3620–3631.
- 683 Ejsing, C.S., Sampaio, J.L., Surendranath, V., Duchoslav, E., Ekroos, K., Klemm,  
684 R.W., Simons, K., and Shevchenko, A. (2009). Global analysis of the yeast lipidome  
685 by quantitative shotgun mass spectrometry. *Proc. Natl. Acad. Sci. U. S. A.* 106, 2136–  
686 2141.
- 687 Feinstein, M., Flusser, H., Lerman-Sagie, T., Ben-Zeev, B., Lev, D., Agamy, O., Cohen,  
688 I., Kadir, R., Sivan, S., Leshinsky-Silver, E., et al. (2014). VPS53 mutations cause  
689 progressive cerebello-cerebral atrophy type 2 (PCCA2). *J. Med. Genet.* 0, 1–7.
- 690 Fiedler, T., Karpova, T., Fleig, U., Young, M., Cooper, J., and Hegemann, J. (2002).  
691 The vesicular transport protein Cgp1p/Vps54p/Tcs3p/Luv1p is required for the integrity  
692 of the actin cytoskeleton. *Mol. Genet. Genomics* 268, 190–205.
- 693 Fröhlich, F., Moreira, K., Aguilar, P.S., Hubner, N.C., Mann, M., Walter, P., and  
694 Walther, T.C. (2009). A genome-wide screen for genes affecting eisosomes reveals  
695 Nce102 function in sphingolipid signaling. *J. Cell Biol.* 185, 1227–1242.
- 696 Fröhlich, F., Christiano, R., and Walther, T.C. (2013). Native SILAC: metabolic labeling  
697 of proteins in prototroph microorganisms based on lysine synthesis regulation. *Mol.*

- 698 Cell. Proteomics 12, 1995–2005.
- 699 Fröhlich, F., Petit, C., Kory, N., Christiano, R., Hannibal-Bach, H.K., Graham, M., Liu,  
700 X., Ejsing, C.S., Farese, R. V, and Walther, T.C. (2015). The GARP complex is  
701 required for cellular sphingolipid homeostasis. *Elife* 4, e08712.
- 702 Gershlick, D.C., Ishida, M., Jones, J.R., Bellomo, A., Bonifacino, J.S., and Everman,  
703 D.B. (2018). A Neurodevelopmental Disorder Caused by Mutations in the VPS51  
704 Subunit of the GARP and EARP Complexes.
- 705 Grossmann, G., Malinsky, J., Stahlschmidt, W., Loibl, M., Weig-Meckl, I., Frommer,  
706 W.B., Opekarová, M., and Tanner, W. (2008). Plasma membrane microdomains  
707 regulate turnover of transport proteins in yeast. *J. Cell Biol.* 183, 1075–1088.
- 708 Hachiro, T., Yamamoto, T., Nakano, K., and Tanaka, K. (2013). Phospholipid flippases  
709 Lem3p-Dnf1p and Lem3p-Dnf2p are involved in the sorting of the tryptophan permease  
710 Tat2p in yeast. *J. Biol. Chem.* 288, 3594–3608.
- 711 Henne, W.M., Buchkovich, N.J., and Emr, S.D. (2011). The ESCRT Pathway. *Dev.*  
712 *Cell* 21, 77–91.
- 713 Hua, Z., Fatheddin, P., and Graham, T.R. (2002). An Essential Subfamily of Drs2p-  
714 related P-Type ATPases Is Required for Protein Trafficking between Golgi Complex  
715 and Endosomal/Vacuolar System. *Mol. Biol. Cell* 13, 3162–3177.
- 716 Huotari, J., and Helenius, A. (2011). Endosome maturation. *EMBO J.* 30, 3481–3500.
- 717 Klionsky, D.J. (2007). Monitoring Autophagy in Yeast. In *Protein Targeting Protocols*,  
718 (Totowa, NJ: Humana Press), pp. 363–371.
- 719 Liu, K., Hua, Z., Nepute, J.A., and Graham, T.R. (2007). Yeast P4-ATPases Drs2p and  
720 Dnf1p Are Essential Cargos of the NPFXD/Sla1p Endocytic Pathway. *Mol. Biol. Cell*  
721 18, 487–500.
- 722 Llinares, E., Barry, A.O., and André, B. (2015). The AP-3 adaptor complex mediates  
723 sorting of yeast and mammalian PQ-loop-family basic amino acid transporters to the  
724 vacuolar/lysosomal membrane. *Sci. Rep.* 5, 16665.
- 725 Ma, M., Burd, C.G., and Chi, R.J. (2017). Distinct complexes of yeast Snx4 family SNX-  
726 BARs mediate retrograde trafficking of Snc1 and Atg27. *Traffic* 18, 134–144.
- 727 Ma, M., Kumar, S., Purushothaman, L., Babst, M., Ungermann, C., Chi, R.J., and Burd,  
728 C.G. (2018). Lipid trafficking by yeast Snx4 family SNX-BAR proteins promotes

- 729 autophagy and vacuole membrane fusion. *Mol. Biol. Cell* 29, 2190–2200.
- 730 Maxfield, F.R., and McGraw, T.E. (2004). Endocytic recycling. *Nat. Rev. Mol. Cell Biol.*  
731 5, 121–132.
- 732 Mioka, T., Fujimura-Kamada, K., Mizugaki, N., Kishimoto, T., Sano, T., Nunome, H.,  
733 Williams, D.E., Andersen, R.J., and Tanaka, K. (2018). Phospholipid flippases and  
734 Sfk1p, a novel regulator of phospholipid asymmetry, contribute to low permeability of  
735 the plasma membrane. *Mol. Biol. Cell* 29, 1203–1218.
- 736 Nakano, K., Yamamoto, T., Kishimoto, T., Noji, T., and Tanaka, K. (2008). Protein  
737 Kinases Fpk1p and Fpk2p are Novel Regulators of Phospholipid Asymmetry. *Mol. Biol.*  
738 *Cell* 19, 1783–1797.
- 739 Olsen, J. V., Macek, B., Lange, O., Makarov, A., Horning, S., and Mann, M. (2007).  
740 Higher-energy C-trap dissociation for peptide modification analysis. *Nat. Methods* 4,  
741 709–712.
- 742 Ong, S.-E., and Mann, M. (2007). Stable Isotope Labeling by Amino Acids in Cell  
743 Culture for Quantitative Proteomics. (Humana Press), pp. 37–52.
- 744 Pan, X., Roberts, P., Chen, Y., Kvam, E., Shulga, N., Huang, K., Lemmon, S., and  
745 Goldfarb, D.S. (2000). Nucleus-Vacuole Junctions in *Saccharomyces cerevisiae* Are  
746 Formed Through the Direct Interaction of Vac8p with Nvj1p.
- 747 Puts, C.F., Panatala, R., Hennrich, H., Tsareva, A., Williamson, P., and Holthuis,  
748 J.C.M. (2012). Mapping functional interactions in a heterodimeric phospholipid pump.  
749 *J. Biol. Chem.* 287, 30529–30540.
- 750 Rad, M.R., Phan, H.L., Kirchrath, L., Tan, P.K., Kirchhausen, T., Hollenberg, C.P., and  
751 Payne, G.S. (1995). *Saccharomyces cerevisiae* Apl2p, a homologue of the mammalian  
752 clathrin AP beta subunit, plays a role in clathrin-dependent Golgi functions. *J. Cell Sci.*  
753 108 ( Pt 4), 1605–1615.
- 754 Reggiori, F., and Klionsky, D.J. (2006). Atg9 sorting from mitochondria is impaired in  
755 early secretion and VFT-complex mutants in *Saccharomyces cerevisiae*. *J. Cell Sci.*  
756 119, 2903–2911.
- 757 Roelants, F.M., Baltz, A.G., Trott, A.E., Fereres, S., and Thorner, J. (2010). A protein  
758 kinase network regulates the function of aminophospholipid flippases. *Proc. Natl.*  
759 *Acad. Sci.* 107, 34–39.

- 760 Seaman, M.N., McCaffery, J.M., and Emr, S.D. (1998). A membrane coat complex  
761 essential for endosome-to-Golgi retrograde transport in yeast. *J. Cell Biol.* 142, 665–  
762 681.
- 763 Shaner, N.C., Lambert, G.G., Chammass, A., Ni, Y., Cranfill, P.J., Baird, M.A., Sell,  
764 B.R., Allen, J.R., Day, R.N., Israelsson, M., et al. (2013). A bright monomeric green  
765 fluorescent protein derived from *Branchiostoma lanceolatum*. *Nat. Methods* 10, 407–  
766 409.
- 767 Siniosoglou, S., and Pelham, H.R.B. (2002). Vps51p links the VFT complex to the  
768 SNARE Tlg1p. *J. Biol. Chem.* 277, 48318–48324.
- 769 Stevens, H.C., Malone, L., and Nichols, J.W. (2008). The Putative Aminophospholipid  
770 Translocases, *DNF1* and *DNF2*, Are Not Required for 7-Nitrobenz-2-oxa-1,3-diazol-  
771 4-yl-phosphatidylserine Flip across the Plasma Membrane of *Saccharomyces*  
772 *cerevisiae*. *J. Biol. Chem.* 283, 35060–35069.
- 773 Takagi, K., Iwamoto, K., Kobayashi, S., Horiuchi, H., Fukuda, R., and Ohta, A. (2012).  
774 Involvement of Golgi-associated retrograde protein complex in the recycling of the  
775 putative Dnf aminophospholipid flippases in yeast. *Biochem. Biophys. Res. Commun.*  
776 417, 490–494.
- 777 Vasan, N., Hutagalung, A., Novick, P., and Reinisch, K.M. (2010). Structure of a C-  
778 terminal fragment of its Vps53 subunit suggests similarity of Golgi-associated  
779 retrograde protein (GARP) complex to a family of tethering complexes. *Proc. Natl.*  
780 *Acad. Sci. U. S. A.* 107, 14176–14181.
- 781 Wiederhold, E., Gandhi, T., Permentier, H.P., Breitling, R., Poolman, B., and Slotboom,  
782 D.J. (2009). The yeast vacuolar membrane proteome. *Mol. Cell. Proteomics* 8, 380–  
783 392.
- 784 Wiśniewski, J.R., Zougman, A., Nagaraj, N., and Mann, M. (2009). Universal sample  
785 preparation method for proteome analysis. *Nat. Methods* 6, 359–362.
- 786 Yao, Z., Liu, X., and Klionsky, D.J. (2017). MitoPho8 $\Delta$ 60 Assay as a Tool to  
787 Quantitatively Measure Mitophagy Activity. *Methods Mol. Biol.*
- 788 Van Zutphen, T., Todde, V., De Boer, R., Kreim, M., Hofbauer, H.F., Wolinski, H.,  
789 Veenhuis, M., Van Der Klei, I.J., and Kohlwein, S.D. (2014). Lipid droplet autophagy in  
790 the yeast *Saccharomyces cerevisiae*.



791

## 792 **Figure Legends**

793 **Figure 1: Vps53 can be depleted using the auxin induced degron system. a)** AID  
794 tagged Vps53 is rapidly degraded after addition of IAA. OsTir Vps53-AID-6HA cells were  
795 treated with IAA or ethanol (control) for the indicated times. Cells were lysed and equal  
796 amounts of proteins were loaded and analyzed by western blotting using antibodies against  
797 the HA tag or Pgk1 as a loading control. An OsTir Vps53-6HA strain was used as a control to  
798 exclude any effect of the AID tag on protein abundance. **b)** Quantification of a (n=7  
799 experiments). Vps53-AID-HA band intensities were quantified and normalized to Pgk1 signals.  
800 Vps53-AID-6HA levels start to significantly decrease after 10 min of IAA induction  
801 ( $P=0.000009824$ ). **c)** Auxin induced degradation of Vps53 phenocopies a *VPS53* deletion.  
802 Wild-type cells, cells expressing OsTir, cells harboring the Vps53-AID-6HA tag, cells  
803 expressing OsTir and Vps53-AID-6HA and *vps53 $\Delta$*  cells were serially diluted on control plates,  
804 plates containing 500 $\mu$ M IAA, plates containing 1 $\mu$ M myriocin and plates containing 500 $\mu$ M  
805 IAA and 1 $\mu$ M myriocin.

806 **Figure 2: Acute depletion of Vps53 leads to vacuolar fragmentation. a)** Yeast cells  
807 expressing Vps53-AID-6HA together with the OsTir ligase and Vph1-GFP (green vacuoles)  
808 and cells expressing only Vps53-AID-6HA and Vph1-mCherry were mixed and treated with  
809 500 $\mu$ M IAA for 0, 30, 60 and 90 mins. Brightfield images (upper panels) and merged images  
810 are shown (lower panels). Only cells expressing OsTir and Vps53-AID-6HA show fragmented  
811 vacuoles. Scale bar = 10  $\mu$ M **b)** Quantification of a. Vacuole fragmentation from three different  
812 experiments (error bars show standard deviation). Shown is the percentage of cells with one  
813 vacuole, 2-3 vacuoles or more than 3 vacuoles (green = a strain harboring OsTir Vps53-AID;  
814 red = a strain harboring only Vps53-AID-6HA). The amount of cells with more than three  
815 (=fragmented) vacuoles increases over time in the functional AID-strain (n=30-200 cells per  
816 setting) **c)** Vacuoles can be purified after auxin induced degradation of Vps53. Fluorescent  
817 microscopy of purified vacuoles from IAA or mock treated Vps53-AID-6HA strains. Cells with  
818 the functional AID-strain and GFP-marked vacuoles were incubated with IAA. Cells with the  
819 functional AID-strain and mCherry-marked vacuoles were mock treated with EtOH as control.  
820 Vacuoles were isolated from the two strains that were mixed prior to lysis. **d)** Quantification of  
821 the amount (left) and the diameter (right) of purified vacuoles. In average from 5 different  
822 samples the amount of vacuoles from IAA induced cells is slightly higher than control vacuoles.  
823 Purified vacuoles from mock treated and IAA treated cells show no significant difference in  
824 vacuolar diameter.

825 **Figure 3: Proteomic analysis of enriched yeast vacuoles. a)** Experimental setup to  
826 determine vacuolar enrichment. **b)** Proteomic analysis of purified vacuoles mixed whole cell

827 lysates. Proteins are color coded according to ratio bins (<-6, green; -6->-5, red; -5->-4, yellow;  
828 -4->-2, orange; -2->5, blue). Protein intensities are plotted against heavy/light SILAC ratios. **c)**  
829 Enriched GO terms in the ratio bins from b. Go terms were calculated according to the Gene  
830 Ontology enRlchment anaLysis and visualizAtion tool, GOrilla.

831 **Figure 3 – supplement 1: List of all proteins identified including SILAC ratios and**  
832 **intensities**

833 **Figure 4: Mass spectrometry based proteomics to identify proteins mis-targeted to**  
834 **vacuoles in GARP depleted cells a)** Experimental setup to determine proteins mis-sorted to  
835 the vacuole in GARP complex depleted cells. **b)** Amino-phospholipid flippases are targeted to  
836 the vacuole after 90 min of IAA induced GARP depletion. Proteomic analysis of vacuoles from  
837 IAA and mock treated OsTir Vps53-AID-6HA cells is shown. Protein intensities are plotted  
838 against heavy/light SILAC ratios. Significant outliers are colored in red ( $P < 10^{-11}$ ), orange ( $P <$   
839  $10^{-4}$ ), or steel blue ( $p < 0.05$ ); other proteins are shown in light blue. **c)** Control experiment for  
840 b). A label switching experiment of IAA induced depletion of GARP followed by proteomics  
841 analysis of the vacuoles is shown. Heavy to light ratios from an experiment where lysine 8  
842 labelled cells were treated with IAA are plotted on the x axis vs the same experiment where  
843 the lysine 0 labelled cells were treated with IAA on the y axis. **d)** Same experiment as in b) but  
844 in *pep4Δ* strains. **e)** Heavy to light ratio profiles of four different proteins are shown over the  
845 time-course of IAA treatment. SILAC ratios of the vacuolar samples are shown in blue, SILAC  
846 ratios of the entire cell extract are shown in red. Note that for the flippase Dnf2 the vacuolar  
847 ratio increases while the ratio for the entire cell extract decreases. Vps10 does not show any  
848 difference in both. Pdr12 ratios increase in both samples. **f)** The AP-2 pathway is the cargo  
849 adaptor for cell wall proteins but not for amino-phospholipid flippases. Proteomic analysis of  
850 vacuoles from IAA treated, light labelled OsTir Vps53-AID-6HA cells and heavy labelled OsTir  
851 Vps53-AID-6HA *ap1Δ* cells is shown. Protein intensities are plotted against heavy/light SILAC  
852 ratios. Significant outliers are colored in red ( $P < 10^{-11}$ ), orange ( $P < 10^{-4}$ ), or steel blue ( $p <$   
853  $0.05$ ); other proteins are shown in light blue.

854 **Figure 4 – supplement 1: List of all proteins identified including SILAC ratios and**  
855 **intensities from the time course of auxin induced Vps53 degradation**

856 **Figure 4 – supplement 2: List of all proteins identified including SILAC ratios and**  
857 **intensities from the control experiments**

858 **Figure 4 – supplement 3: List of all proteins identified including SILAC ratios and**  
859 **intensities from auxin induced Vps53 degradation in a *pep4Δ* background**

860 **Figure 4 – supplement 4: List of all proteins identified including SILAC ratios and**  
861 **intensities from auxin induced Vps53 degradation in *aap1Δ* background**

862 **Figure 5: Plasma membrane localized flippases re-localize to vacuoles in GARP**  
863 **complex depleted cells. a)** Co-localization of mNeon-tagged Lem3 (second row from top)  
864 with mCherry-tagged Vph1 (third row from top) are shown in mock treated and IAA treated  
865 cells. Representative mid-sections are shown. Scale bar = 5 $\mu$ M **b)** Quantification of 4 different  
866 experiments shows co-localization of vacuoles and Lem3 in approximately 15% of cells after  
867 90 min (error bars show standard deviation). **c)** Co-localization of mNeon-tagged Dnf2 (second  
868 row from top) with mCherry-tagged Vph1 (third row from top) are shown in mock treated and  
869 IAA treated cells. Representative mid-sections are shown. Scale bar = 5 $\mu$ M **d)** Quantification  
870 shows an increase in the number of cells where Dnf2 co-localizes with vacuoles after IAA  
871 induced degradation of Vps53 up to 15% after 90 min. Error bars show the standard deviation  
872 of 3 different experiments. **e)** Fold change Pho8 activity of plasma membrane reporters for  
873 sorting into vacuoles. Fold change was calculated as the ratio of drug treated and control  
874 samples. (IAA for Dnf2, Lem3, Pdr12 and inositol for Itr1). Error bars represent standard  
875 deviations from three to five independent experiments.

876 **Figure 5 – supplement 1: Colocalization studies of Lem3, Dnf2, Vps10 and Pdr12**  
877 **with vacuoles after IAA induced degradation of Vps53. a)** Co-localization of mNeon-tagged  
878 Lem3 with mCherry-tagged Vph1 in a strain harboring OsTir Vps53-AID-6HA are shown in  
879 mock treated (upper panels; upper part) and IAA treated cells (lower panels; upper part).  
880 Representative mid-sections are shown. Co-localization of mNeon-tagged Lem3 with  
881 mCherry-tagged Vph1 in a strain harboring only OsTir are shown in mock treated (upper  
882 panels; lower part) and IAA treated cells (lower panels; lower part). Representative mid-  
883 sections are shown. **b)** Co-localization of mNeon-tagged Dnf2 with mCherry-tagged Vph1 in a  
884 strain harboring OsTir Vps53-AID-6HA are shown in mock treated (upper panels; upper part)  
885 and IAA treated cells (lower panels; upper part). Representative mid-sections are shown. Co-  
886 localization of mNeon-tagged Dnf2) with mCherry-tagged Vph1 in a strain harboring only OsTir  
887 are shown in mock treated (upper panels; lower part) and IAA treated cells (lower panels; lower  
888 part). Representative mid-sections are shown. **c)** Co-localization of mNeon-tagged Vps10 with  
889 mCherry-tagged Vph1 in a strain harboring OsTir Vps53-AID-6HA are shown in mock treated  
890 (upper panels; upper part) and IAA treated cells (lower panels; upper part). Representative  
891 mid-sections are shown. Co-localization of mNeon-tagged Vps10 with mCherry-tagged Vph1 in  
892 a strain harboring only OsTir are shown in mock treated (upper panels; lower part) and IAA  
893 treated cells (lower panels; lower part). Representative mid-sections are shown. **d)** Co-  
894 localization of mNeon-tagged Pdr12 with mCherry-tagged Vph1 in a strain harboring OsTir  
895 Vps53-AID-6HA are shown in mock treated (upper panels; upper part) and IAA treated cells  
896 (lower panels; upper part). Representative mid-sections are shown. Co-localization of mNeon-  
897 tagged Pdr12 with mCherry-tagged Vph1 in a strain harboring only OsTir are shown in mock

898 treated (upper panels; lower part) and IAA treated cells (lower panels; lower part).  
899 Representative mid-sections are shown. scale bars = 5 $\mu$ M

900 **Figure 6: GARP depletion pheno-copies the deletion of *LEM3* and affects the cellular**  
901 **lipidome. a)** GARP knockouts and *LEM3* knockouts show highly correlating profiles in  
902 chemical genomics datasets. Correlation coefficients (CCs) between the profile of *LEM3* and  
903 each other profile in the chemogenetic screen (REF) are plotted on the x-axis. Plotted on the  
904 y-axis are the similar sets of values for the *VPS52* profile with all other profiles. **b)** Depletion  
905 of *VPS53* or *LEM3* results in resistance to the cytotoxic PC analog miltefosine. WT cells, OsTir  
906 cells, *Vps53-AID* OsTir cells, *vps53 $\Delta$*  cells, OsTir *TEF\_LEM3* cells, *Vps53-AID* OsTir  
907 *TEF\_LEM3* and *lem3 $\Delta$*  cells were spotted on control plates (top left panel), plates containing  
908 500  $\mu$ M IAA (top right panel), plates containing miltefosine (lower left panel) or a combination  
909 of IAA and miltefosine (lower right panel). **c)** GARP depletion results in changes of the cellular  
910 phospholipid composition. The lipidomic analysis of phosphoglycerolipids and sphingolipid  
911 intermediates from IAA treated OsTir *Vps53-AID-6HA* (black bars) or OsTir *Vps53 -6HA* cells  
912 are shown. Long chain bases (LCB), ceramides (CER) phosphatidic acid (PA), phosphatidyl-  
913 serine (PS), phosphatidyl-inositol (PI), phosphatidyl-ethanolamine (PE) phosphatidylcholine  
914 (PC) and phosphatidylglycerol (PG). **d)** GARP depletion has a minor effect on the vacuolar  
915 lipidome. Same as c) except that lipids were extracted from enriched vacuoles. Error bars  
916 represent standard deviations from three different experiments.

917 **Supplementary table 1: List of all yeast strains used in this study**

918 **Supplementary table 2: List of all plasmids used in this study**

919

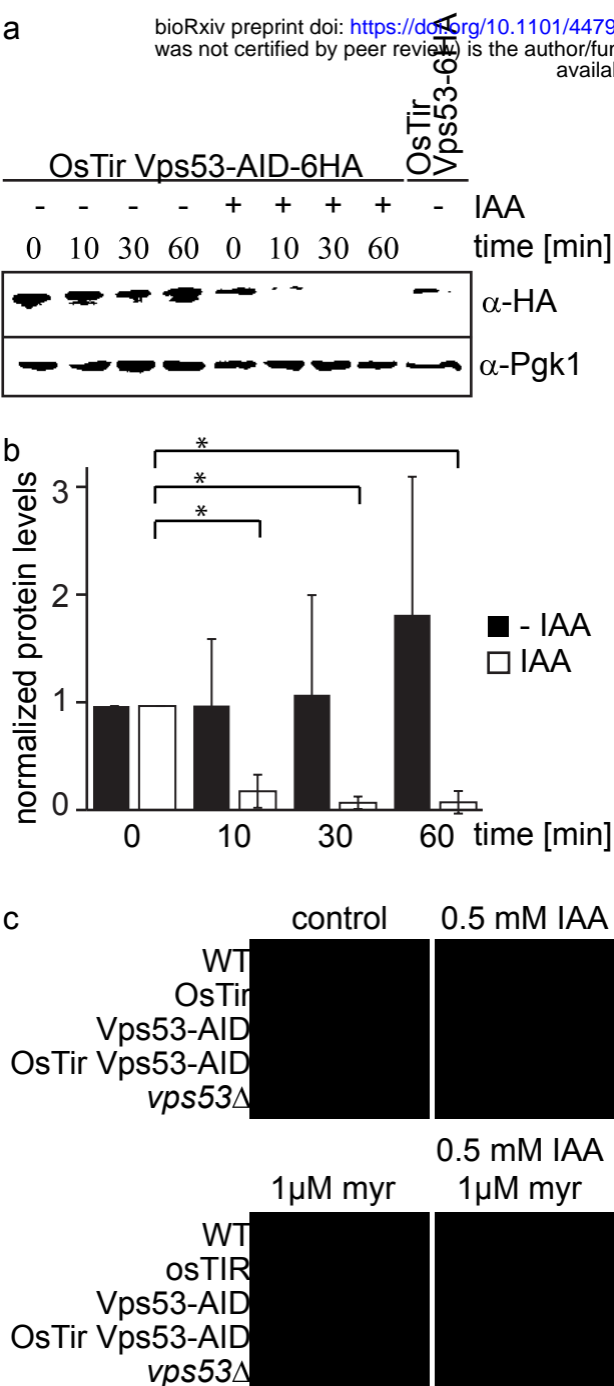

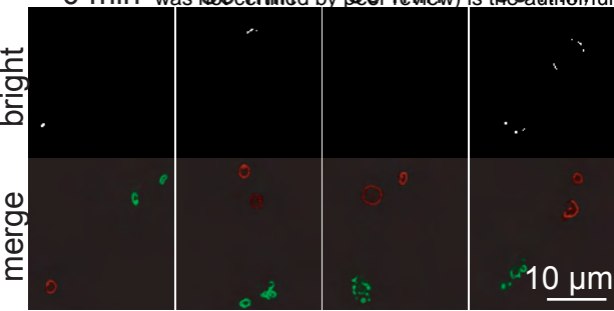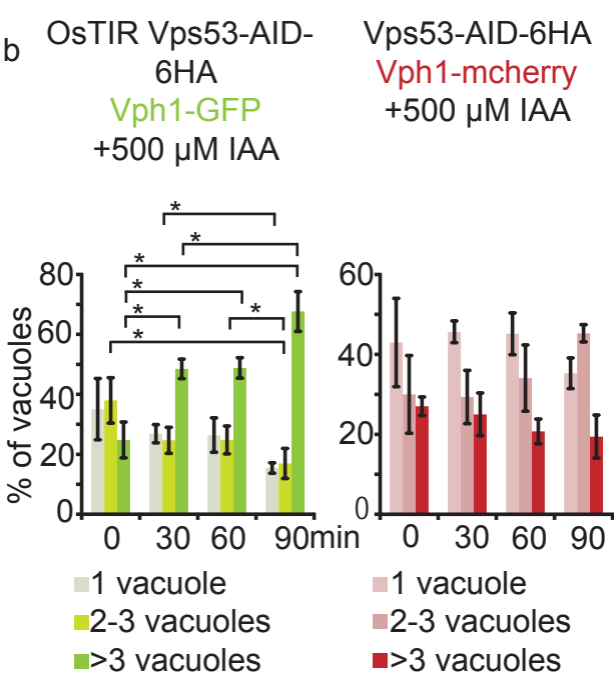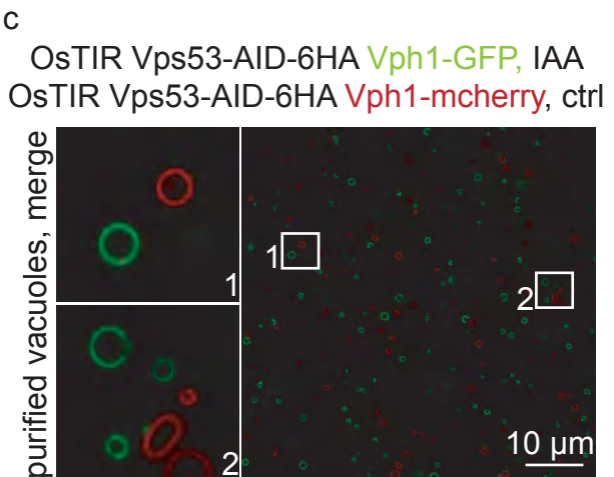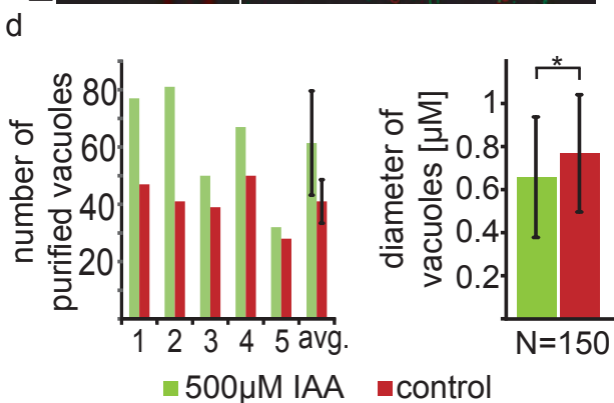

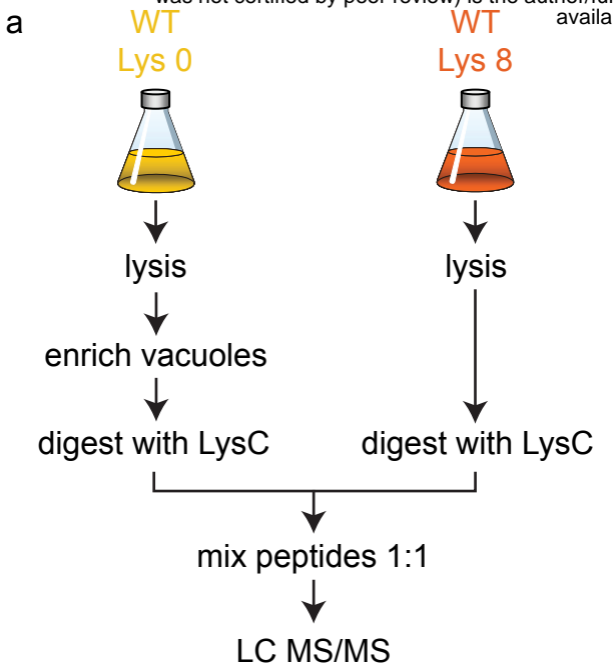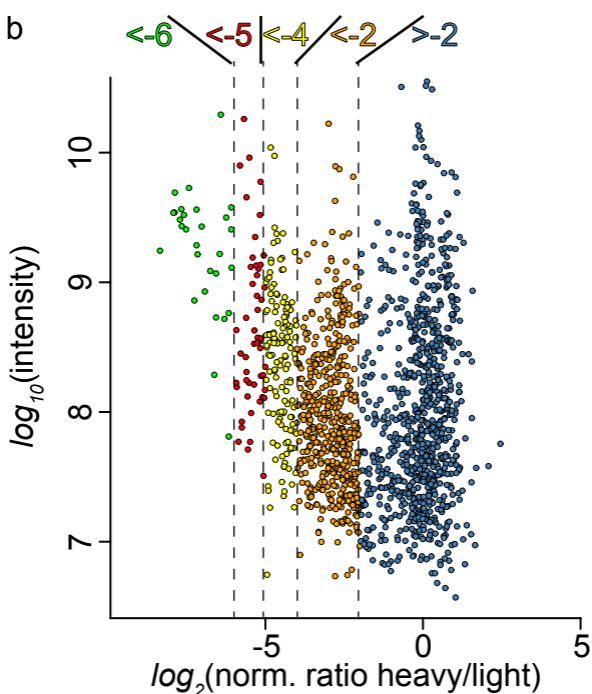

**c**

| GO term          | P-value                    | enrichment   |
|------------------|----------------------------|--------------|
| <b>vacuole</b>   | <b>4.86E<sup>-28</sup></b> | <b>11.88</b> |
| <b>vacuole</b>   | <b>4.26E<sup>-14</sup></b> | <b>6.73</b>  |
| ER               | 1.25E <sup>-59</sup>       | 6.04         |
| lipid drop.      | 6.14E <sup>-10</sup>       | 9.26         |
| vacuole          | 6.83E <sup>-6</sup>        | 2.46         |
| membrane         | 6.36E <sup>-25</sup>       | 2.05         |
| ER               | 1.49E <sup>-18</sup>       | 3.10         |
| vacuole membrane | 3.94E <sup>-6</sup>        | 2.95         |

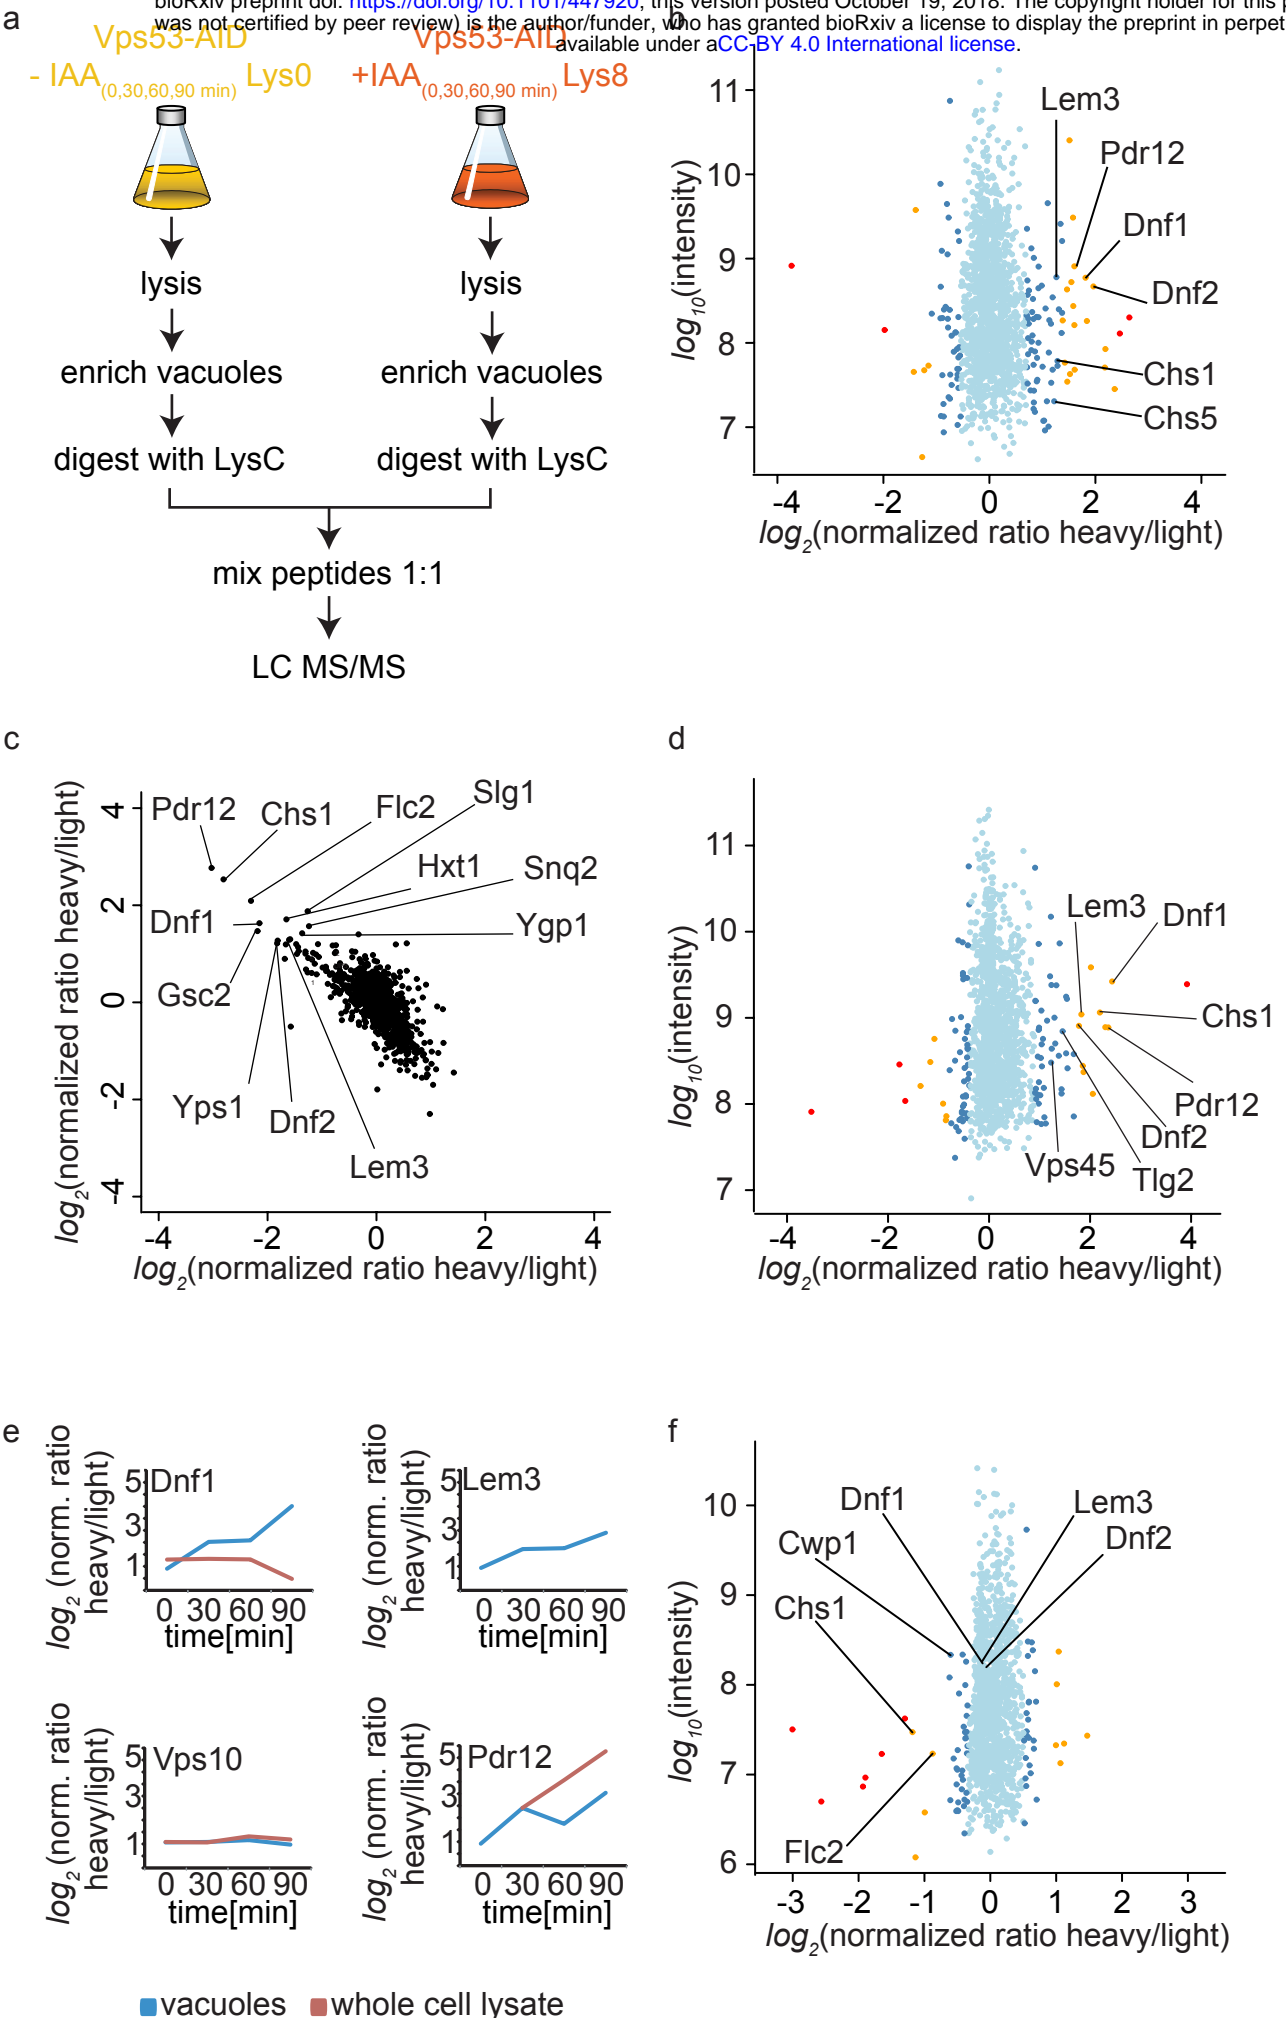



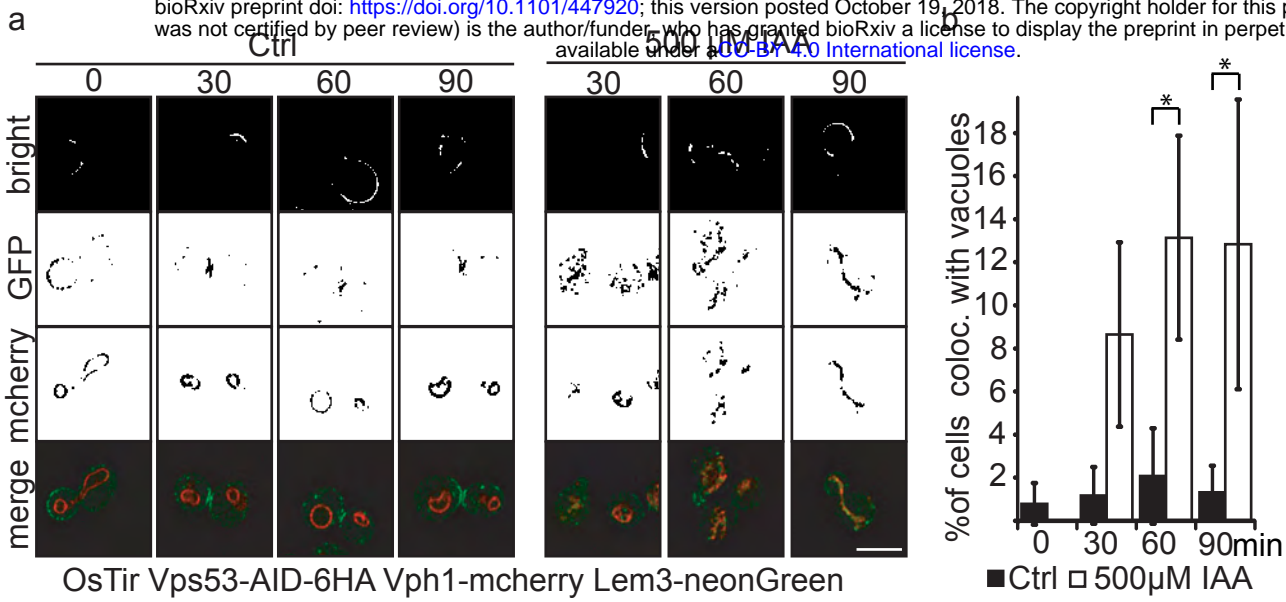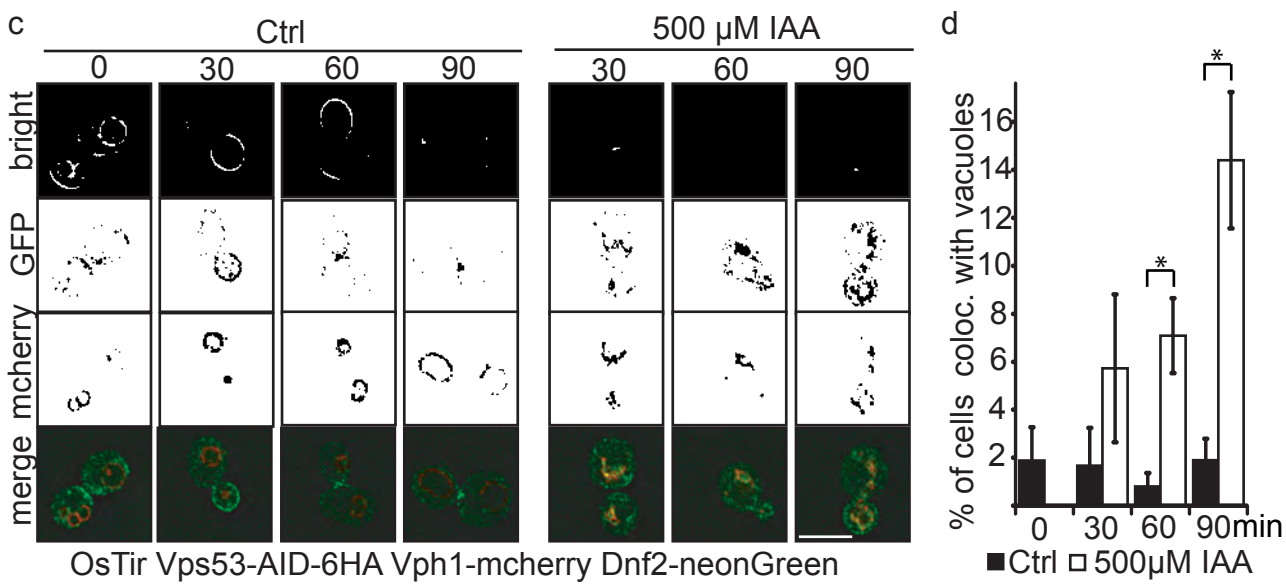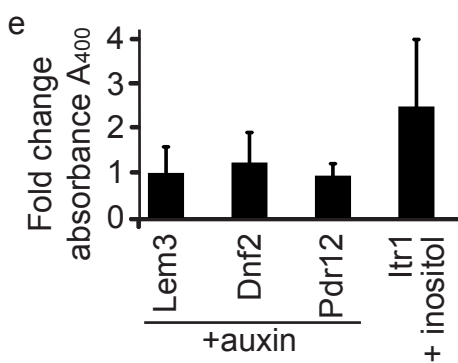

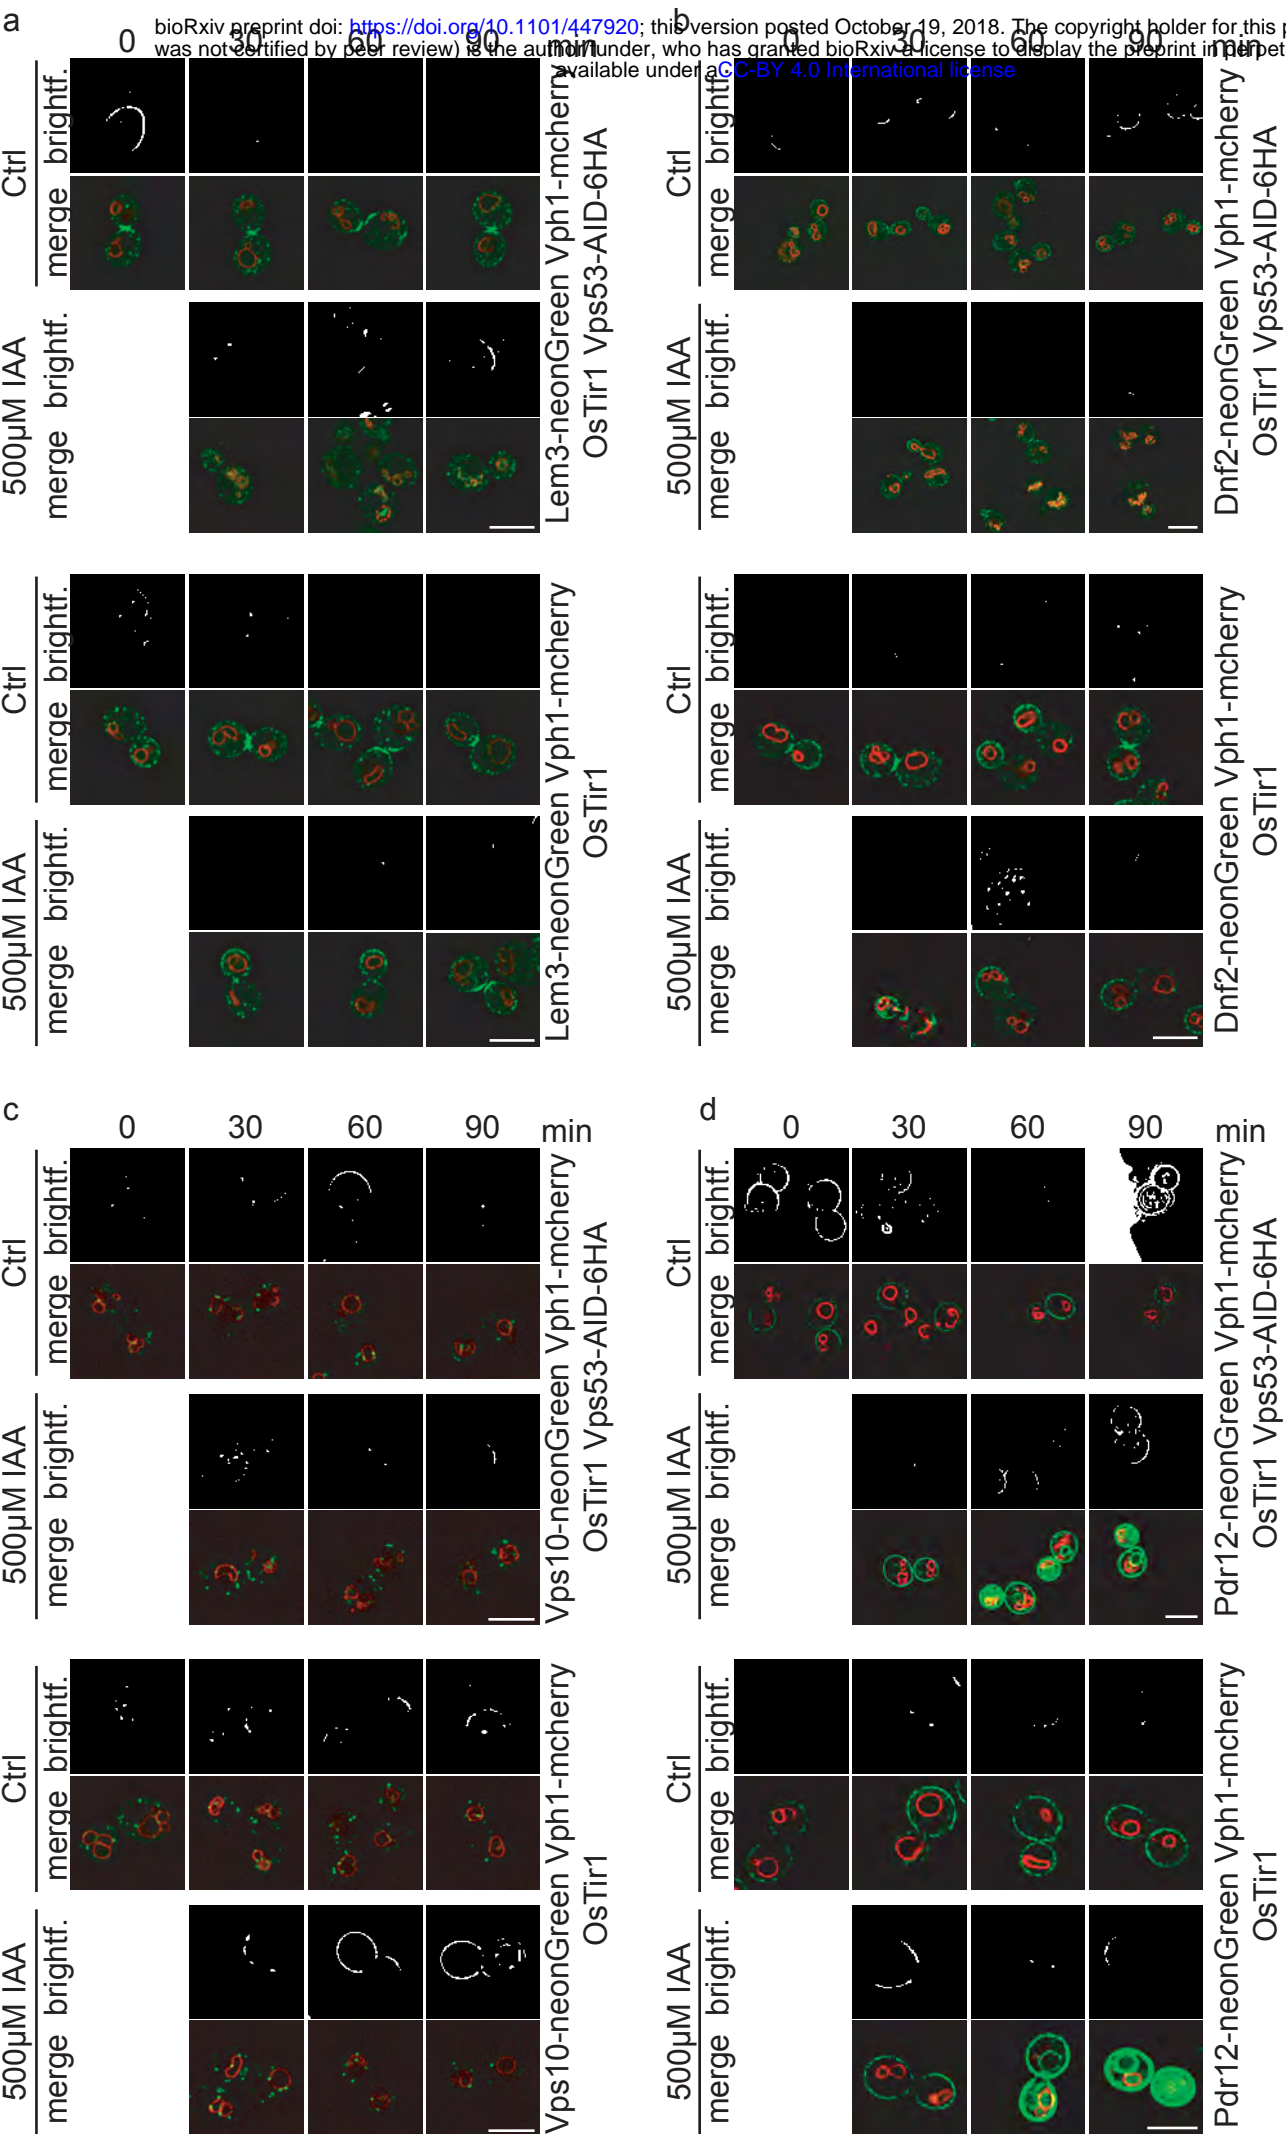

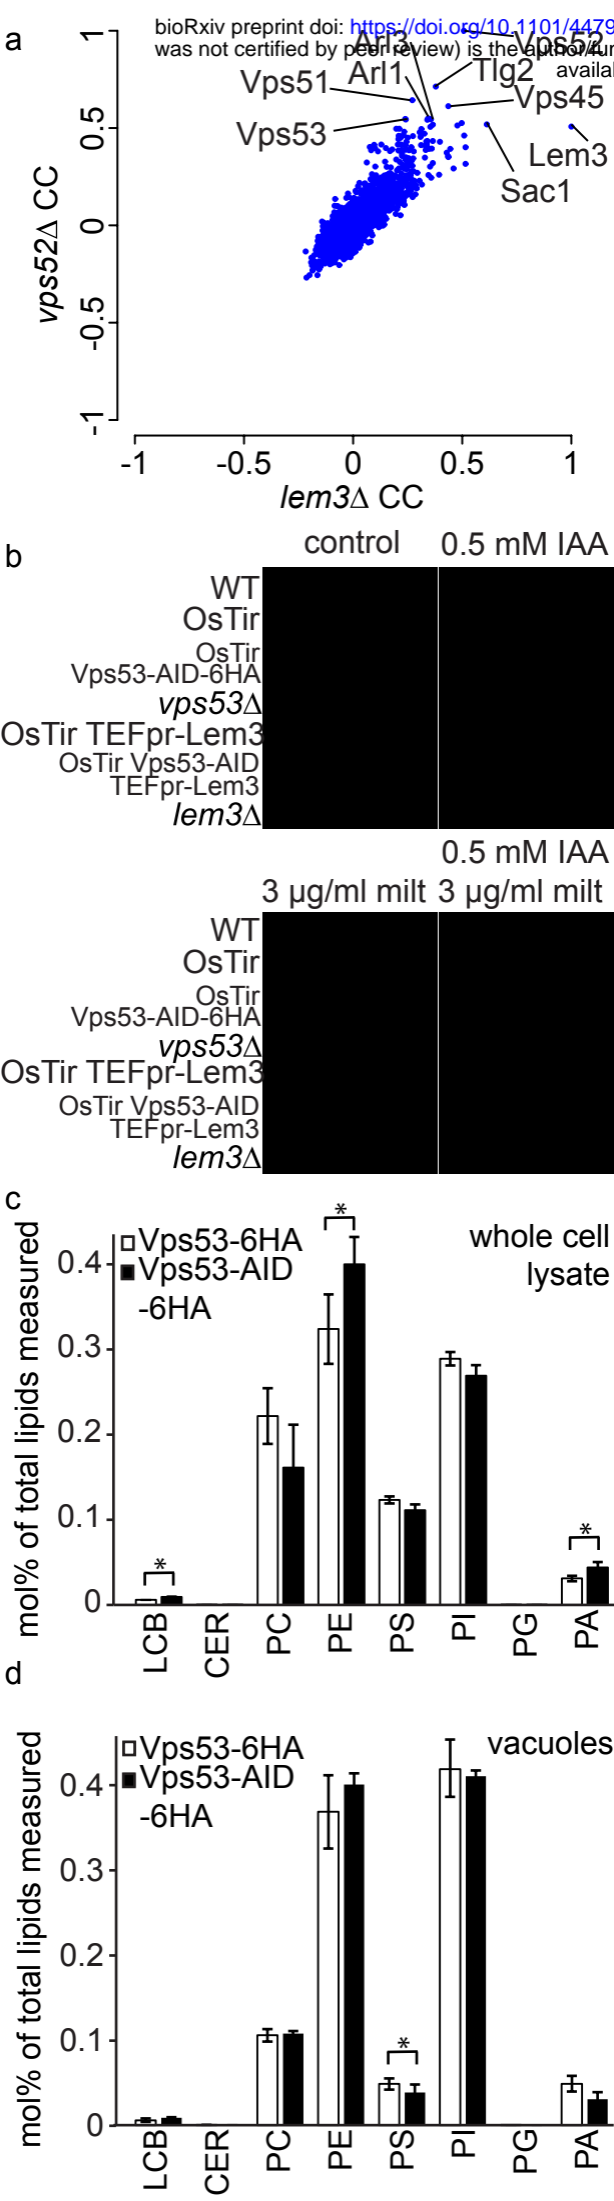

**Tab. 1** Used yeast strains

| Strain  | Genotype                                                                                                                                                                                                    | Reference                          |
|---------|-------------------------------------------------------------------------------------------------------------------------------------------------------------------------------------------------------------|------------------------------------|
| FFY541  | SEY6210 MAT $\alpha$ leu2-3,112 ura3-52 his3- $\Delta$ 200 trp- $\Delta$ 901 lys2-801 suc2- $\Delta$ 9 GAL                                                                                                  | Robinson et al. 1988 Mol Cell Biol |
| FFY535  | SEY6210 MAT $\alpha$ leu2-3,112 ura3-52 his3- $\Delta$ 200 trp- $\Delta$ 901 lys2-801 suc2- $\Delta$ 9 GAL URA3::pBW2406_ADHpr-OSTIR-9myc VPS53-AID-6xHA::HPH                                               | This study                         |
| FFY838  | SEY6210 Mat $\alpha$ leu2-3,112 ura3-52 his3- $\Delta$ 200 trp1- $\Delta$ 901 suc2- $\Delta$ 9 lys2-801; GAL pRS305_ADHpr-OSTIR-3xFlag::LEU VPS53-AID-6xHA::HPH                                             | This study                         |
| FFY837  | SEY6210 MAT $\alpha$ leu2-3,112 ura3-52 his3- $\Delta$ 200 trp1- $\Delta$ 901 suc2- $\Delta$ 9 lys2-801; GAL pRS305_ADHpr-OSTIR-3xFlag::LEU VPH1-mCherry::KAN                                               | This study                         |
| FFY906  | SEY6210 MAT $\alpha$ leu2-3,112 ura3-52 his3- $\Delta$ 200 trp1- $\Delta$ 901 suc2- $\Delta$ 9 lys2-801; GAL pRS305_ADHpr-OSTIR-3xFlag::LEU VPS53-AID-6xHA::HPH VPH1-GFP::KAN                               | This study                         |
| FFY1034 | SEY6210 MAT $\alpha$ leu2-3,112 ura3-52 his3- $\Delta$ 200 trp- $\Delta$ 901 lys2-801 suc2- $\Delta$ 9 GAL VPS53-AID-6xHA::HPH VPH1-mcherry::KAN                                                            | This study                         |
| FFY851  | SEY6210 MAT $\alpha$ leu2-3,112 ura3-52 his3- $\Delta$ 200 trp1- $\Delta$ 901 suc2- $\Delta$ 9 lys2-801; GAL pRS305_ADHpr-OSTIR-3xFlag::LEU VPH1-mCherry::KAN VPS53-AID-6xHA::HPH                           | This study                         |
| FFY925  | SEY6210 MAT $\alpha$ leu2-3,112 ura3-52 his3- $\Delta$ 200 trp- $\Delta$ 901 lys2-801 suc2- $\Delta$ 9 GAL pRS305_ADHpr-OSTIR-3xFLAG::LEU                                                                   | This study                         |
| FFY1008 | SEY6210 MAT $\alpha$ leu2-3,112 ura3-52 his3- $\Delta$ 200 trp- $\Delta$ 901 lys2-801 suc2- $\Delta$ 9 GAL VPS53-AID-6xHA::HPH                                                                              | This study                         |
| FFY943  | SEY6210 MAT $\alpha$ leu2-3,112 ura3-52 his3- $\Delta$ 200 trp- $\Delta$ 901 lys2-801 suc2- $\Delta$ 9 GAL URA3::pBW2406_ADH1pr-OSTIR1-9myc VPS53-AID-6xHA::HPH pep4 $\Delta$ ::NAT                         | This study                         |
| FFY944  | SEY6210 MAT $\alpha$ leu2-3,112 ura3-52 his3- $\Delta$ 200 trp1- $\Delta$ 901 suc2- $\Delta$ 9 lys2-801; GAL pRS305_ADHpr-OSTIR-3xFLAG::LEU VPH1-mCherry::KAN VPS53-AID-6xHA::HPH pep4 $\Delta$ ::NAT       | This study                         |
| FFY954  | SEY6210 MAT $\alpha$ leu2-3,112 ura3-52 his3- $\Delta$ 200 trp1- $\Delta$ 901 suc2- $\Delta$ 9 lys2-801; GAL pRS305_ADHpr-OSTIR1-3xFlag::LEU VPS53-AID-6xHA::HPH VPH1-mCherry::TRP PDR12-neonGreen::KAN     | This study                         |
| FFY1040 | SEY6210 MAT $\alpha$ leu2-3,112 ura3-52 his3- $\Delta$ 200 trp1- $\Delta$ 901 suc2- $\Delta$ 9 lys2-801; GAL pRS305_ADHpr-OSTIR1-3xFlag::LEU VPH1-mCherry::TRP PDR12-neonGreen::KAN                         | This study                         |
| FFY1050 | SEY6210 MAT $\alpha$ leu2-3,112 ura3-52 his3- $\Delta$ 200 trp- $\Delta$ 901 lys2-801 suc2- $\Delta$ 9 GAL pRS305_ADHpr-OSTIR-3xFLAG::LEU DNF2-neonGreen::KAN VPH1-mCherry::TRP                             | This study                         |
| FFY1015 | SEY6210 MAT $\alpha$ leu2-3,112 ura3-52 his3- $\Delta$ 200 trp1- $\Delta$ 901 suc2- $\Delta$ 9 lys2-801; GAL pRS305_ADHpr-OSTIR-3xFlag::LEU VPS53-AID-6xHA::HPH VPH1-mCherry::TRP ADHpr-DNF2-neonGreen::KAN | This study                         |
| FFY1143 | SEY6210 MAT $\alpha$ leu2-3,112 ura3-52 his3- $\Delta$ 200 trp- $\Delta$ 901 lys2-801 suc2- $\Delta$ 9 GAL pRS305_ADHpr-OSTIR-3xFLAG::LEU VPH1-mCherry::TRP LEM3-neonGreen::KAN                             | This study                         |

|         |                                                                                                                                                                                                                                                    |                         |
|---------|----------------------------------------------------------------------------------------------------------------------------------------------------------------------------------------------------------------------------------------------------|-------------------------|
| FFY1142 | <i>SEY6210 MAT<math>\alpha</math> leu2-3,112 ura3-52 his3-<math>\Delta</math>200 trp1-<math>\Delta</math>901 suc2-<math>\Delta</math>9 lys2-801; GAL pRS305_ADHpr-OSTIR-3xFlag::LEU VPS53-AID-6xHA::HPH VPH1-mCherry::TRP LEM3-neonGreen::KAN</i>  | This study              |
| FFY1066 | <i>SEY6210 MAT<math>\alpha</math> leu2-3,112 ura3-52 his3-<math>\Delta</math>200 trp1-<math>\Delta</math>901 suc2-<math>\Delta</math>9 lys2-801; GAL pRS305_ADHpr-OSTIR-3xFlag::LEU VPH1-mCherry::TRP VPS10-neonGreen::KAN</i>                     | This study              |
| FFY1067 | <i>SEY6210 MAT<math>\alpha</math> leu2-3,112 ura3-52 his3-<math>\Delta</math>200 trp1-<math>\Delta</math>901 suc2-<math>\Delta</math>9 lys2-801; GAL pRS305_ADHpr-OSTIR-3xFlag::LEU VPS53-AID-6xHA::HPH VPH1-mCherry::TRP VPS10-neonGreen::KAN</i> | This study              |
| FFY607  | <i>SEY6210 MAT<math>\alpha</math> leu2-3,112 ura3-52 his3-<math>\Delta</math>200 trp1-<math>\Delta</math>901 ade2-101 suc2-<math>\Delta</math>9; GAL vps53<math>\Delta</math>::NAT</i>                                                             | This study              |
| FFY1144 | <i>SEY6210 MAT<math>\alpha</math> leu2-3,112 ura3-52 his3-<math>\Delta</math>200 trp-<math>\Delta</math>901 lys2-801 suc2-<math>\Delta</math>9 GAL lem3<math>\Delta</math>::NAT</i>                                                                | This study              |
| FFY1014 | <i>SEY6210 Mat <math>\alpha</math> leu2-3,112 ura3-52 his3-<math>\Delta</math>200 trp1-<math>\Delta</math>901 suc2-<math>\Delta</math>9 lys2-801; GAL pRS305_ADHpr-OSTIR-3xFlag::LEU VPS53-6xHA::HPH</i>                                           | This study              |
| FFY1195 | <i>leu2-3,112 ura3-52 his3-<math>\Delta</math>200 trp1-<math>\Delta</math>901 suc2-<math>\Delta</math>9 lys2-801; GAL pRS305_ADHpr-OSTIR-3xFLAG::LEU VPS53-AID-6xHA::HPH TEFpr-LEM::NAT</i>                                                        | This study              |
| FFY1281 | <i>leu2-3,112 ura3-52 his3-<math>\Delta</math>200 trp-<math>\Delta</math>901 lys2-801 suc2-<math>\Delta</math>9 GAL pRS305_ADHpr-OSTIR-3xFLAG::LEU TEFpr-LEM::NAT</i>                                                                              | This study              |
| FFY1208 | <i>W303 MAT<math>\alpha</math> leu2-3,112 trp1-1 ura3-1 his3-11,15 pho8<math>\Delta</math>::HIS3 pho13<math>\Delta</math>::TRP</i>                                                                                                                 | Schuck et al., JCS 2014 |
| FFY1209 | <i>W303 MAT<math>\alpha</math> leu2-3,112 trp1-1 ura3-1 his3-11,15 pho8<math>\Delta</math>::HIS3 pho13<math>\Delta</math>::TRP pRS305_ADHpr-OSTIR-3xFLAG::LEU VPS53-AID-6xHA::HPH DNF2-PHO8<math>\Delta</math>60::KAN</i>                          | This study              |
| FFY1210 | <i>W303 MAT<math>\alpha</math> leu2-3,112 trp1-1 ura3-1 his3-11,15 pho8<math>\Delta</math>::HIS3 pho13<math>\Delta</math>::TRP pRS305_ADHpr-OSTIR-3xFLAG::LEU VPS53-AID-6xHA::HPH LEM3-PHO8<math>\Delta</math>60::KAN</i>                          | This study              |
| FFY1211 | <i>W303 MAT<math>\alpha</math> leu2-3,112 trp1-1 ura3-1 his3-11,15 pho8<math>\Delta</math>::HIS3 pho13<math>\Delta</math>::TRP pRS305_ADHpr-OSTIR-3xFLAG::LEU VPS53-AID-6xHA::HPH ITR1-PHO8<math>\Delta</math>60::KAN</i>                          | This study              |
| FFY1212 | <i>W303 MAT<math>\alpha</math> leu2-3,112 trp1-1 ura3-1 his3-11,15 pho8<math>\Delta</math>::HIS3 pho13<math>\Delta</math>::TRP pRS305_ADHpr-OSTIR-3xFLAG::LEU VPS53-AID-6xHA::HPH TAT1-PHO8<math>\Delta</math>60::KAN</i>                          | This study              |
| FFY1213 | <i>W303 MAT<math>\alpha</math> leu2-3,112 trp1-1 ura3-1 his3-11,15 pho8<math>\Delta</math>::HIS3 pho13<math>\Delta</math>::TRP pRS305_ADHpr-OSTIR-3xFLAG::LEU VPS53-AID-6xHA::HPH PDR12-PHO8<math>\Delta</math>60::KAN</i>                         | This study              |
| FFY1299 | <i>SEY6210 Mat <math>\alpha</math> leu2-3,112 ura3-52 his3-<math>\Delta</math>200 trp1-<math>\Delta</math>901 suc2-<math>\Delta</math>9 lys2-801; GAL pRS305_ADHpr-OSTIR-3xFlag::LEU VPS53-AID-6xHA::HPH apl1<math>\Delta</math></i>               | This study              |

**Tab. 2** Used plasmids

| <b>plasmid</b>            | <b>Reference</b>                      |
|---------------------------|---------------------------------------|
| pRS305_ADHpr_OsTir_3xFlag | Robbie Loewith                        |
| pFA6a_Pho8Δ60_kanMX 6     | Sebastian Schuck, J. Cell Sci. (2014) |
